1 **Context-dependent 3D genome regulation by cohesin and related factors**

2

3 Ryuichiro Nakato<sup>1,§,\*</sup>, Toyonori Sakata<sup>2,3,§</sup>, Jiankang Wang<sup>1</sup>, Luis Augusto Eijy Nagai<sup>1</sup>,

4 Gina Miku Oba<sup>1</sup>, Masashige Bando<sup>2</sup> and Katsuhiko Shirahige<sup>2,3,\*</sup>

5 <sup>1</sup>Laboratory of Computational Genomics, Institute for Quantitative Biosciences, University of Tokyo, 1-1-1

6 Yayoi, Bunkyo-Ku, Tokyo 113-0032, Japan

7 <sup>2</sup>Laboratory of Genome Structure and Function, Institute for Quantitative Biosciences, University of Tokyo, 1-

8 1-1 Yayoi, Bunkyo-Ku, Tokyo 113-0032, Japan

9 <sup>3</sup>Karolinska Institutet, Department of Biosciences and Nutrition, Biomedicum, Quarter A6, 171 77, Stockholm,

10 Sweden

11

12 <sup>§</sup>These authors contributed equally to this work.

13 \*To whom correspondence should be addressed: [rnakato@iqb.u-tokyo.ac.jp](mailto:rnakato@iqb.u-tokyo.ac.jp), [kshirahi@iqb.u-tokyo.ac.jp](mailto:kshirahi@iqb.u-tokyo.ac.jp)

14

15 **ABSTRACT**

16 Cohesin plays vital roles in chromatin folding and gene expression regulation, cooperating with such  
17 factors as cohesin loaders, unloaders, acetyltransferase, and the insulation factor CTCF. Although  
18 various models of regulation have been proposed (e.g., loop extrusion), how cohesin and related  
19 factors collectively or individually regulate the hierarchical chromatin structure and gene expression  
20 remains unclear. In this study, we have depleted cohesin and related factors and then conducted a  
21 comprehensive evaluation of the resulting 3D genome, transcriptome and epigenome data. We  
22 observed substantial variation in depletion effects among factors at topologically associating domain  
23 (TAD) boundaries and on interTAD interactions, which were partly related to epigenomic status.  
24 Gene expression changes were highly correlated with direct cohesin binding and gain of TAD

25 boundaries than with the loss of boundaries. Our results suggested that cohesin positively regulates  
26 gene expression, whereas other mechanisms (e.g., cohesin turnover and acetylation) add to the  
27 diversity of this pattern of dysregulation. Moreover, cohesin was broadly enriched in active  
28 compartment A, but not in compartment B, which were retained even after CTCF depletion.  
29 Our rich dataset and the subsequent data-driven analysis support the context-specific regulation of  
30 chromatin folding by cohesin and related factors.

31

32 **Keywords:** Computational genomics, 3D genome, transcriptome, epigenome, cohesin, CTCF, NIPBL

33

## 34 INTRODUCTION

35 The cohesin complex is crucial for gene transcription and chromatin folding in mammalian  
36 cells (Merkenschlager and Nora 2016; van Ruiten and Rowland 2018). Cohesin colocalizes with the  
37 CCCTC-binding factor CTCF to function as an insulator (Wendt et al. 2008), whereas a small  
38 proportion of cohesin binds the genome independently of CTCF, regulating gene expression with  
39 tissue-specific transcription factors (Schmidt et al. 2010; Faure et al. 2012). At least a subset of  
40 CTCF-independent cohesin mediates chromatin interactions between enhancer and promoter sites of  
41 active genes with mediator complexes (Kagey et al. 2010). Cohesin also participates in transcription  
42 elongation machinery that interacts with RNA polymerase II (Pol2) (Izumi et al. 2015). Mutations in  
43 the cohesin loader NIPBL (~60%) and in cohesin subunits (~10%) have been found in the human  
44 developmental disorder Cornelia de Lange syndrome (CdLS) (Kline et al. 2018).

45 Recent studies using whole-genome chromatin-conformation capture (Hi-C) uncovered a  
46 hierarchical three-dimensional (3D) genome structure regulated by cohesin and its related factors.  
47 Chromosomes are spatially segregated into active “compartment A” and inactive “compartment B”  
48 (Lieberman-Aiden et al. 2009). At a finer scale, chromosomes are folded into topologically  
49 associating domains (TADs), the boundaries of which are strongly enriched for cohesin and CTCF  
50 (Dixon et al. 2012). TADs can be nested, and interactions between TADs (interTAD interactions) are  
51 more rare than those within TADs (intraTAD interactions) (Bonev and Cavalli 2016). The depletion

52 of cohesin or NIPBL causes a dramatic loss of TADs and chromatin loops (Rao et al. 2017;  
53 Schwarzer et al. 2017), whereas CTCF depletion affects TAD boundaries and loops more locally  
54 (Nora et al. 2017). These observations can be explained by the “loop extrusion” model, in which  
55 cohesin extrudes chromatin until it encounters CTCF, resulting in the formation of TADs (Fudenberg  
56 et al. 2016; Davidson et al. 2019; Kim et al. 2019). This model can also explain depletion effects of  
57 cohesin unloading factors (WAPL, PDS5A and PDS5B), which prevent the release of cohesin from  
58 DNA and cause loop extension, resulting in the appearance of longer loops than usual (Haarhuis et al.  
59 2017; Wutz et al. 2017). Importantly, such extended loops are rare but also occur in wild-type cells  
60 (Allahyar et al. 2018), suggesting that CTCF boundaries are not absolute and the dynamics of  
61 TADs/loop formation may depend on the amount of cohesin on chromatin, which is balanced by  
62 continuous loading and unloading (turnover).

63         Despite these extensive efforts, the detailed mechanism of the hierarchical chromosome  
64 organization and the functional relationships involved in regulating transcription are still unclear  
65 (Sikorska and Sexton 2020). Extensive loss of TADs/loops and loop extension have a limited impact  
66 on gene expression and does not cause the spread of histone modifications (Haarhuis et al. 2017; Nora  
67 et al. 2017; Rao et al. 2017; Schwarzer et al. 2017; Ghavi-Helm et al. 2019). A dCas9-mediated  
68 insertion of boundary sequence was insufficient for creating TAD boundaries *de novo* (Bonev et al.  
69 2017). Moreover, cohesin and CTCF also localize within TADs without forming boundaries. These  
70 results suggest a more complicated set of rules for chromatin structure formation and gene expression  
71 regulation by cohesin and related factors than the current models. Although each cohesin-related  
72 factor has been studied using different cell lines, a study to explore how cohesin and its related factors  
73 collectively or individually regulate chromatin folding, gene expression and the epigenome is needed.

74         Here we conducted a large-scale *in situ* Hi-C analysis after depletion of a variety of cohesin-  
75 related factors, with multiple replicates (31 samples, 14 billion paired-end reads in total). Combined  
76 with transcriptome and epigenome marks data, we comprehensively evaluated the similarities and  
77 differences in the resulting effects after depletion of individual factors. The resulting extensive dataset

78 and subsequent analysis provide new insights into the context-specific roles of cohesin-related factors  
79 on gene expression and chromatin folding.

80

## 81 **RESULTS**

### 82 **Datasets**

83 Here we used human retinal pigment epithelial (RPE) cells to avoid the effect of aneuploidy  
84 or other genomic rearrangements (Figure 1A). We depleted cohesin (Rad21), cohesin loaders (NIPBL  
85 and Mau2), cohesin unloaders (WAPL, PDS5A and PDS5B), boundary element (CTCF) and cohesin  
86 acetyltransferase (ESCO1) and also carried out two sets of co-depletions (Rad21 and NIPBL, PDS5A  
87 and B). We confirmed that the depletion efficiencies were sufficient for all samples (Figure 1A) and  
88 that the majority of asynchronous cells were in G1 phase (Figure S1A). We used a 72-h treatment  
89 with short interfering RNA (siRNA) for most samples, but we also explored the effect of different  
90 treatment times (24, 48 and 120 h, Figure 1B). We also generated a sample that had been treated with  
91 the BET bromodomain inhibitor JQ1 because the bromodomain protein BRD4 is reported to interact  
92 with NIPBL and to be mutated in CdLS (Olley et al. 2018). Using these samples, we prepared *in situ*  
93 Hi-C, RNA-seq and spike-in ChIP-seq data (Tables S1–3). In the spike-in ChIP-seq, we observed that  
94 60–80% of the peaks in control cells were lost after siRNA (Figure S1B).

95 We evaluate the overall similarity among our Hi-C samples and found that the depletion  
96 effects can be categorized into four groups that correspond to the siRNA target (Figure 1C): cohesin  
97 and loaders, CTCF, cohesin unloaders and acetyltransferase, and control and JQ1. The exception was  
98 PDS5A and B co-depletion, which showed less correlation with NIPBL depletion (siNIPBL). Cohesin  
99 unloader and acetyltransferase depletion showed a milder effect on chromosome structure as  
100 compared with the cohesin loading and localization at CTCF sites. Having confirmed the sufficient  
101 similarity among replicates, we merged all replicates into a single deep Hi-C dataset for control,

102 siRad21, siNIPBL (except for the 24-h treatment), siCTCF and siESCO1, resulting in at most 3 billion  
103 reads, for further analysis of these depletions.

104

### 105 **Comparative Hi-C analysis reveals diverse depletion effects on chromatin folding**

106 We first analyzed Hi-C data and compared the depletion effects on TADs and loops. We  
107 observed a dramatic loss of TADs and loops after siRad21 and siNIPBL (Figures 1D and 1E),  
108 consistent with the previous studies (Rao et al. 2017; Schwarzer et al. 2017). Co-depletion of Rad21  
109 and NIPBL showed a more severe effect. Mau2 depletion showed a milder effect than siNIPBL,  
110 possibly because some amount of cohesin can be loaded without Mau2 (Haarhuis et al. 2017).  
111 Although CTCF depletion strongly affected loops, it had a limited effect on TAD numbers and  
112 intraTAD interactions as compared with cohesin depletion (Figures 1D and 1E), indicating the  
113 function of CTCF as a boundary element (Nora et al. 2017; Hansen 2020). Most loops in the control  
114 samples anchored convergent CTCF motif sites as reported (Vietri Rudan et al. 2015), which was  
115 slightly violated after siWAPL, siPDS5AB and siCTCF (Figure S1C).

116 Compartmentalization can be uncoupled from TAD formation, which is strengthened by the  
117 depletion of cohesin and loaders (Haarhuis et al. 2017; Rao et al. 2017; Schwarzer et al. 2017) but not  
118 of CTCF (Nora et al. 2017). We observed a similar tendency in our data, as indicated by the “plaid  
119 pattern” (Figure S2A) and quantitative compartment strength estimated by a saddle plot (Figures 1E  
120 and S2B). siMau2 showed stronger compartmentalization than siRad21, in contrast to its milder effect  
121 on TADs and loops, suggesting the importance of cohesin loaders for compartmentalization. This  
122 tendency was also indicated by the relative contact frequency of mapped reads (Figure 1F). The  
123 depletion of cohesin and loaders diminished interactions at a length consistent with TADs (~1 Mb),  
124 whereas the long-range interactions corresponding to the compartment (~10 Mb) drastically increased.  
125 In contrast, depletion of CTCF, WAPL, PDS5B, PDS5AB or ESCO1 decreased long-range  
126 interactions, suggesting weakened compartmentalization. The depletion of PDS5A alone did not show

127 a clear tendency. Lastly, we did not observe prominent compartment switching among any of the  
128 samples (Figure S2C).

129 We next explored the loop length distribution that showed a distinct tendency from the  
130 relative contact probability (Figure 1G). After siRad21, most short loops were depleted, and the  
131 distribution peaked at a longer length (~10 Mbp) than did the control (~500 kbp). siCTCF showed a  
132 similar but less drastic effect. After siNIPBL and after NIPBL and Rad21 co-depletion, a dramatic  
133 loss of short loops was observed, whereas a small number of long-range interactions appeared (> 5  
134 Mbp, possibly due to the cohesin-independent long-range loops (Rao et al. 2017)). In contrast, siMau2  
135 resulted in highly depleted long loops (~1 Mbp), and the distribution then peaked at a shorter length  
136 than the control (~400 kbp), which was similar to the effect of siPDS5A and JQ1. Based on the loop  
137 extrusion model, it was likely that shorter loops were retained under the mild loss of cohesin after  
138 siMau2. After depletion of PDS5B, PDS5A and B or WAPL, the peak distribution increased slightly  
139 relative to control samples (~500 kbp), consistent with their function as cohesin unloaders. siESCO1  
140 also caused the appearance of longer loops, similar to the effect of siPDS5B.

141 Additionally, we investigated the allele-specific depletion effect on chromosome X. Whereas  
142 the active chromosome X (Xa) forms the typical chromosome structure, inactive chromosome X (Xi)  
143 is partitioned into two megadomains, the boundary between which was affected by depletion of  
144 cohesin (Wang et al. 2018; Kriz et al. 2021). Although our data did not show an explicit disruption of  
145 the megadomain boundary in Xi, possibly due to incomplete siRNA depletion, we did observe a  
146 difference in depletion effects between Xi and Xa (Figure S3). Xi showed a “coarser” plaid pattern  
147 than Xa, which was strengthened by siRad21 and siNIPBL. siCTCF showed an asymmetric tendency  
148 of interaction frequency between the megadomain boundary and the two megadomains (black arrows),  
149 whereas there was no similarly clear chromosome-wide pattern in Xa. In addition, the interaction  
150 within the smaller megadomain was less affected in all samples. In summary, our Hi-C analysis  
151 showed consistent tendencies with previous studies, confirming its reliability, and provided multiple  
152 new findings of diverse depletion effects on chromatin folding.

153

#### 154 **Gene expression changes were correlated with direct cohesin binding**

155           Next, we explored the depletion effect on gene expression. We detected 2,000–7,000  
156 differentially expressed genes (DEGs) for each sample (false discovery rate [FDR] < 0.01; Figures 2A  
157 and S4A). We selected the top-ranked 1,000 DEGs from all samples and merged them into a single  
158 DEG list (4,240 genes in total). Pairwise comparisons showed extensive overlap of DEGs between  
159 cohesin and loaders and between individual unloaders (Figure 2A). Interestingly, siNIPBL was more  
160 similar to siPDS5B than siRad21 and siMau2, suggesting DEGs from dysregulation of cohesin  
161 turnover. siCTCF and JQ1 showed less correlation with the others, suggesting their distinct roles for  
162 gene expression regulation.

163           To identify the pattern of expression dysregulation, we applied k-means clustering ( $k = 20$ )  
164 based on the overlap of up- and downregulated genes among siRNA treatments (Figure 2B and Table  
165 S4). For example, clusters 6 and 10 represent down- and upregulated genes after cohesin and loader  
166 depletion, respectively. Gene ontology (GO) analysis suggested that cluster 6 was mainly enriched in  
167 “growth factor activity,” consistent with slower growth under such depletions (Waizenegger et al.  
168 2000). Clusters 9 and 18 contained down- and upregulated genes after NIPBL and unloader depletions,  
169 respectively. These DEGs were not observed after siRad21 and therefore would be correlated with  
170 cohesin turnover. Their GO terms were correlated with fundamental functions related to the  
171 cytoskeleton and extracellular matrix. These diverse expression patterns suggested multiple roles for  
172 cohesin-related factors in gene expression regulation.

173           We next examined the enrichment of ChIP-seq peaks and Hi-C loops at transcription start  
174 sites (TSSs) of the DEGs (Figure 2C). Most clusters were enriched for Rad21 and Mau2 peaks,  
175 suggesting that expression dysregulation of these clusters was caused by loss of Rad21 and Mau2  
176 binding to each gene, rather than by region-wide effects caused by TAD disruption. We also found  
177 that the siRad21 DEGs were less likely to be located around disrupted TADs compared with non-

178 differential boundaries (Figure S4B), suggesting little correlation between TAD disruption and gene  
179 expression dysregulation after siRad21. The exception was downregulated genes after siWAPL  
180 (cluster 3 and 9), which were independent of cohesin binding, implying the indirect or unrelated  
181 regulation relative to cohesin. In addition, loops mediated by acetylated cohesin (Smc3ac) were  
182 enriched in upregulated DEGs associated with siNIPBL and siPDS5B (clusters 1, 7, 18), whereas  
183 clusters not enriched for Smc3ac (12, 13, 15) were downregulated. Considering that acetylated  
184 cohesin sites are more stable and thus were more persistent even under siNIPBL and siRad21 as  
185 compared with non-acetylated sites (Figure 2C), this result suggests the necessity of cohesin at TSSs  
186 for gene expression.

187 Figure 2D shows the CHIP-seq distribution around several top-ranked DEG loci, each of  
188 which have cohesin peaks around their TSSs. Remarkably, Rad21 peaks around TSSs were lost after  
189 siNIPBL, whereas they remained after siCTCF (red arrows), suggesting that cohesin binds at TSSs in  
190 a more CTCF-independent manner. In contrast, Rad21 peaks in other regions were lost after siCTCF  
191 (black arrows). We confirmed that this tendency was genome-wide (Figure 2E). siNIPBL  
192 significantly depleted cohesin peaks at upstream and exon regions, whereas siCTCF affected intron  
193 and intergenic regions. In summary, our result suggested that cohesin positively regulates gene  
194 expression via direct binding at TSSs, whereas other mechanisms (e.g., turnover and acetylation) add  
195 to the diversity of this pattern of dysregulation.

196

### 197 **Quantitative classification of insulation levels reveals diversity among boundaries**

198 To further study the depletion effects on chromatin folding, we calculated a multi-scale  
199 insulation score (Crane et al. 2015) (Figures 3A and 3B). We found various patterns of insulation  
200 perturbation at TAD boundaries: (i) boundaries weakened by siRad21 and siNIPBL but not by  
201 siCTCF (cohesin-dependent), (ii) boundaries strengthened by siNIPBL and siRad21 (cohesin-  
202 separated), (iii) boundaries depleted by siRad21, siNIPBL and siCTCF (all-dependent) and (iv)



203 boundaries that were barely affected by any siRNA (robust). To quantify the observed patterns across  
204 the genome, we classified all boundaries into six types based on insulation score (Figure 3C and Table  
205 S5). In this classification, over half of the boundaries were annotated “robust,” indicating their  
206 stability in the presence of reduced amounts of a targeted protein. Most of the rest were classified as  
207 weakened boundaries after siRNA. Depletion of unloader proteins did not show an explicit  
208 perturbation, which is consistent with their minimal influence on the number of TADs (Figure 1E).  
209 Regarding the comparison with compartments, CTCF-dependent and cohesin-separated boundaries  
210 occurred more frequently between compartments A and B, whereas cohesin-dependent ones occurred  
211 less frequently (Figure 3D). This result suggests that cohesin has a role in connecting neighboring  
212 TADs (Schwarzer et al. 2017), especially those from compartments A and B, whereas CTCF is  
213 involved in partitions within compartment A and, to a lesser extent, compartment B.

214 We also investigated the overlap of boundaries and CHIP-seq peaks and DEGs (Figures 3E  
215 and S6). While cohesin-dependent and CTCF-dependent boundaries were enriched for loops and  
216 CTCF peaks, there were few DEGs there. In contrast, cohesin-separated boundaries significantly  
217 overlapped with upregulated DEGs after depletion of cohesin and loaders. Upregulated DEGs  
218 associated with unloader siRNA were also enriched, although not significantly. At the boundaries,  
219 Mau2 was strikingly enriched, but Rad21, CTCF and loops were not. This result suggested that loss of  
220 cohesin loading enhances insulation at the Mau2 peak regions (indicating cohesin loading points),  
221 which often occur at A-A and A-B boundaries (Figure 3D), resulting in the dysregulation of  
222 expression of some genes. As CTCF-separated boundaries also overlapped with DEGs (although not  
223 significantly), a gain of boundaries would be more highly correlated with DEGs than a loss of  
224 boundaries. Interestingly, DEGs were not enriched at cohesin-dependent boundaries, even though  
225 Pol2 was enriched there. Whereas CTCF-independent boundaries were preferred by active genes  
226 (Bonev et al. 2017), the loss of such boundaries may not necessarily cause gene expression  
227 dysregulation. These observations highlight the necessity of considering the boundary type when  
228 investigating the correlation between chromatin folding and gene expression as regulated by cohesin.

229

### 230 **Context-specific depletion effects on interTAD interactions**

231 In addition to the six boundary types (Figure 3C), we also found long-range insulation  
232 boundaries that appeared after siNIPBL and siRad21 (500 kbp~; Figure 3B, red rectangle). The  
233 insulation likely reflected the strong depletion of the interaction between an active TAD (A4, enriched  
234 by active markers and Pol2) and an inactive compartment B TAD (B2; Figure 4A, black arrows).  
235 Although a decreased interaction between active and inactive regions is compatible with finer  
236 compartmentalization (Schwarzer et al. 2017), this depletion effect was more region specific and was  
237 not symmetric (e.g., there was a milder effect between B2 and A5; Figure 4A). Moreover, we also  
238 observed a difference even between siRad21 and siNIPBL on interTAD interactions (e.g., A3-B2;  
239 Figure 4A, black rectangles), despite their closely similar effects on TAD and loop structures. We  
240 were therefore interested in the variation in perturbations of interTAD interactions among different  
241 siRNA targets.

242 To identify such a strong effect of depletions on interTAD interactions, we calculated the  
243 directional relative frequency (DRF) (Wang and Nakato 2021), which evaluates the directional bias of  
244 long-range depletion effects (Figure 4B). We scanned the whole genome and identified 241 regions in  
245 which DRF values significantly changed after cohesin or loader depletion (Figure 4C and Table S6).  
246 Some of them corresponded to a decrease across broad regions (Figure 4C, C1 and C2), while other  
247 regions showed a decreased interaction at one side of TADs (Figure 4C, C3 and C4), reminiscent of  
248 the “stripe” structure (Vian et al. 2018). While stripes were reported to be located near super-enhancer  
249 regions (Vian et al. 2018), the differential DRF regions in our data were often located at the changing  
250 points of compartment PC1 value (Figures 4C and 4D). The strong depletion in interTAD interactions  
251 is likely to be distinct from the strengthened compartmentalization because PC1 values around the  
252 changing points were not perturbed by siNIPBL (Figure 4D). Moreover, these interactions often  
253 increased after siRNA of unloaders; therefore, the effect was inversely correlated. The interaction-  
254 increased regions were often larger than the detected TADs in the control (e.g., C1 and C2),

255 suggesting loop extension (Haarhuis et al. 2017; Wutz et al. 2017). Interestingly, siESCO1 showed a  
256 smaller but similar effect relative to unloaders in some cases, in which the edge interactions were  
257 strengthened (Figure 4C, also supported by the loop length distribution; Figure 1G). We examined  
258 this tendency across all 241 regions and confirmed the contrasting depletion effects between  
259 cohesin/loaders and unloaders, as well as the positive correlation between ESCO1 and unloaders  
260 (except for siPDS5A, Figures 4E and S7B). Considering that ESCO1 facilitates loop stabilization and  
261 boundary formation together with CTCF (Wutz et al. 2020), our results suggested that inhibition of  
262 cohesin acetylation causes the more frequent pass-through of cohesin at CTCF roadblocks, resulting  
263 in loop extension.

264

#### 265 **Depletion effects of cohesin and loaders were uncoupled for long-range interactions**

266 We next evaluated the correlation between epigenomic features and depletion effects on long-  
267 range interactions using a structured interaction matrix analysis (SIMA) (Lin et al. 2012; Seitan et al.  
268 2013) for interactions at a distance of 500 kbp–5 Mbp. Strikingly, there was a context-dependent  
269 difference among depletions (Figures 5A and S8A). Whereas interactions between active markers  
270 (H3K4me2, H3K4me3, H3K27ac, Med1 and Pol2) increased after both siRad21 and siNIPBL,  
271 interactions between the suppressive marker H3K27me3 and the active markers decreased only after  
272 siNIPBL. CTCF depletion increased interactions, especially between promoter marks (Pol2,  
273 H3K4me2 and H3K4me3). Again, the depletion of cohesin unloaders showed the opposite tendency  
274 relative to that of siNIPBL, whereas SIMA also indicated a difference between PDS5A and B.  
275 siPDS5A mainly affected interactions across active markers and H3K27me3, whereas siPDS5B  
276 affected cohesin (Rad21 and Smc3ac) and CTCF binding sites, similar to the effect of siWAPL. The  
277 effect of siPDS5AB was equivalent to the combined effect of siPDS5A and siPDS5B. siESCO1  
278 affected cohesin, CTCF and enhancer markers.

279 We found that the difference between siRad21 and siNIPBL was mainly derived from global  
280 increase of long-range interactions (>2 Mbp) in siRad21, which correspond to interTAD interactions  
281 (Figures 5B and S8B). The increase could be involved in strengthened compartmentalization (Rao et  
282 al. 2017; Schwarzer et al. 2017), but it cannot explain the difference between siRad21 and siNIPBL.  
283 We also found sporadic interactions increased only in siRad21, which might correspond to H3K27ac  
284 peaks (Figure 6A). In contrast to our findings in Figure 4, depletion of cohesin unloaders did not show  
285 the opposite tendency. Rad21 and NIPBL co-depletion showed a similar effect to siNIPBL alone. This  
286 suggested that the amount of cohesin on chromatin has a different effect on long-range interactions  
287 relative to the frequency of cohesin loading.

288 Finally, we tested whether there is a region-wide depletion effect between TADs and the  
289 relationship to the epigenome, as was shown in Figure 4A. For this, we annotated all TADs with  
290 epigenomic marks and then classified all TAD pairs based on the relative change in interactions  
291 between them (Figures 6B–D). The interactions increased after siRad21 but decreased after siNIPBL  
292 in cluster 4. The cluster was enriched for interactions between H3K9me3 and active marks (Figure  
293 6D), which included the difference shown in Figure 4A (A3-B2, black rectangle). The interactions  
294 decreased after both siRad21 and siNIPBL in clusters 1 and 3, which included interactions among  
295 H3K27me3, H3K9me3 and active markers. This tendency was consistent with the depleted long-  
296 range interactions (A4-B2; Figure 4A). In summary, depletion of cohesin and a cohesin loader  
297 differently affected the long-range interTAD interactions in an epigenomic-dependent manner.

298

### 299 **Cohesin is broadly distributed but is more important for TAD formation in the active** 300 **compartment**

301 To directly analyze the depletion effect on the epigenome, we detected the genomic regions  
302 significantly changed after siRNA compared with control (Figures 7A and S9A). H3K27ac marks  
303 were largely perturbed after NIPBL and Rad21 depletion, whereas H3K36me3 and H3K9me3 were

304 not substantially affected. Though H3K27me3 enrichment also increased after siNIPBL (Figure S9A),  
305 we did not observe a spread of it caused by the loss of TAD boundaries. Therefore, the H3K27ac  
306 perturbation was likely derived from changes in intraTAD or interTAD interactions.

307 Remarkably, we observed a broad decrease in cohesin after siRad21 and siNIPBL, whereas  
308 siCTCF depleted only Rad21 binding at CTCF binding sites (Figure 7A). This indicated that cohesin  
309 is located not only in Rad21 peak regions but also in background regions, as assumed in the loop  
310 extrusion model (Fudenberg et al. 2016). CTCF acts as an obstacle for cohesin translocation (resulting  
311 in sharp cohesin peaks at CTCF sites) but does not control the amount of cohesin on chromatin. This  
312 also explains why CTCF depletion decreased loops but had less of an effect on intraTAD interactions  
313 (Figures 1D and 1E). However, in compartment B regions, such a substantial depletion of cohesin in  
314 the background was not observed (Figure 7A, blue bars). We further investigated this tendency across  
315 the genome by dividing compartments A and B into “strong” and “weak” ones based on their PC1  
316 values and confirmed the larger amount of cohesin particularly in “strongA” regions (Figures 7B and  
317 7C). We further investigated the cohesin density using extended ChromHMM (Wang and Nakato  
318 2021) and found that cohesin accumulated to the highest levels at highly active sites (enriched by  
319 H3K27ac and H3K4me, Figure S9B). Heterochromatin regions enriched for H3K9me3 in  
320 compartment B showed subtle cohesin enrichment. siCTCF did not show such a context-specific  
321 tendency (Figures 7C and S9B), and therefore the imbalance in the amount of cohesin between  
322 compartments A and B was retained even after loss of CTCF-dependent boundaries, which are often  
323 located between A and B (Figure 3D). We also found a milder loss of intraTAD interactions in  
324 StrongB than in StrongA, although siCTCF affected both (Figures 7D and 7E). Taken together, our  
325 data showed that cohesin also accumulated in non-peak regions, mainly in compartment A, possibly  
326 to regulate genes and enhancer activity. In heterochromatic regions, a very small amount of cohesin  
327 may be sufficient to maintain TADs, or other systems may maintain TADs such as phase separation  
328 (Strom et al. 2017) instead of loop extrusion.

329

## 330 **DISCUSSION**

331           Despite multiple promising models (Wendt et al. 2008; Kagey et al. 2010; Schmidt et al. 2010;  
332 Izumi et al. 2015; Fudenberg et al. 2016), the cooperative or distinct roles of cohesin in combination  
333 with related factors with respect to chromatin folding and gene expression are not fully understood,  
334 especially in a context-specific manner. In this study, we found a variety of TAD boundaries and  
335 interTAD interactions that should be considered when investigating the functional and mechanistic  
336 relationships of cohesin. Whereas several studies have reported genome clustering based on a single  
337 Hi-C data—e.g., a third compartment (Yaffe and Tanay 2011) and six subcompartments (Rao et al.  
338 2014)—our analysis focused on the variation of depletion effects and classified genomic regions using  
339 multiple Hi-C data. Although it should be noted that cohesin- and CTCF-independent boundaries may  
340 be lost after extreme depletion (e.g., by an auxin-inducible degradation system; (Rao et al. 2017)), our  
341 data have delineated the dominant factors for boundaries. The perturbation of long-range interTAD  
342 interactions observed in this study cannot be captured by a typical analysis that evaluates only the  
343 number/strength of TADs and loops.

344           Most of the cohesin-related DEGs were related to the direct binding of cohesin around TSSs,  
345 which was more CTCF-independent. This result is reminiscent of a report using mouse embryonic  
346 fibroblast (MEF) cells (Busslinger et al. 2017), in which cohesin accumulated near TSSs of active  
347 genes after CTCF knockout. Some DEGs were also enriched near cohesin-separated boundaries, in  
348 which Mau2 specifically accumulated. In contrast, the disruption of TAD boundaries was less  
349 correlated with DEGs and histone modifications. We also found DEGs that were similarly  
350 dysregulated among siNIPBL and depletion of unloaders, possibly due to dysregulation of cohesin  
351 turnover. Because the deficiency of cohesin turnover is one of the causes for CdLS (Deardorff et al.  
352 2012), the DEGs could be candidates for CdLS studies. Whereas the BRD4 mutation also causes a  
353 CdLS-like syndrome (Olley et al. 2018), there was little effect of JQ1 on chromatin folding despite  
354 the many isolated JQ1-related DEGs. Considering the report that BET inhibition does not disrupt  
355 enhancer–promoter contact (Crump et al. 2021), the CdLS phenotype might not involve the

356 perturbation of chromatin structure but could be caused by direct transcription regulation by cohesin,  
357 e.g., transcription machinery interacting with Pol2 (Izumi et al. 2015; Busslinger et al. 2017).

358 For interTAD interactions, although we also found several genes whose changes in expression  
359 were consistent with the depletion effect on the interTAD interaction, the effect was often not region-  
360 wide (e.g., *RUNX1*; Figures S9C and S9D). Region-wide gene expression dysregulation may occur  
361 with gene clusters: for example, most *PCDH* genes located on chromosome 5 were detected as DEGs  
362 and showed cooperative dysregulation (upregulated with unloader depletion, downregulated with  
363 loader depletion; Figure S10). Whether these DEGs are the result of TAD disruption or of changes in  
364 interTAD interactions, or if their expression is regulated independently via cohesin binding at TSSs or  
365 other gene-specific factors, are important questions for future studies.

366 Despite their closely similar effects on TADs and loops, we also observed a difference in  
367 siRad21 and siNIPBL with respect to H3K27me3 and H3K9me3 enrichment. Together with the  
368 strengthened compartmentalization under siMau2, the frequency of cohesin loading should be  
369 considered separately from the amount of cohesin on chromatin. Meanwhile, the epigenomic state  
370 alone cannot fully explain the trend for interTAD interactions, given that the same phenomenon does  
371 not occur in all regions that show the same epigenomic pattern.

372 Compared with the cohesin loaders, the depletion of unloader proteins had different effects on  
373 transcriptome and chromatin folding, suggesting their nonredundant roles. WAPL and PDS5B showed  
374 a more unloader-like effect, whereas siPDS5A was more related to effects on the epigenome (e.g.,  
375 Figure 5A). siESCO1 showed a weaker but similar effect relative to that of unloader depletion on  
376 chromatin folding, suggesting the involvement of cohesin acetylation in CTCF roadblocks.  
377 Considering that DEGs of siESCO1 overlapped to a greater extent with cohesin loader and unloaders  
378 than did those associated with siCTCF, the role of cohesin acetylation in gene expression regulation  
379 would be mainly related to the cohesin pass-through at CTCF roadblocks in loop extrusion, rather  
380 than the formation of stable chromatin loops mediated by acetylated cohesin (Wutz et al. 2020).

381 We demonstrated that cohesin is broadly distributed within compartment A, not only at peak  
382 sites of Rad21 or CTCF localization. Because cohesin should simultaneously function to regulate

383 gene expression and form TADs, a large amount of cohesin could be required to maintain dynamic  
384 structures in compartment A. Cohesin did not accumulate substantially in compartment B, in which  
385 there was a smaller effect of cohesin depletion. Under the loop-extrusion model, cohesin distribution  
386 should have become more uniform after CTCF depletion because of the loss of cohesin stalling at  
387 CTCF sites. However, the unequal amounts of cohesin between compartments A and B were retained  
388 after siCTCF, whereas we did observe increased interactions between neighboring TADs with the  
389 depletion of CTCF-dependent boundaries (e.g., Figure 4A). Therefore, the amount of cohesin on the  
390 genome would not be merely derived from loop extrusion but be affected by the genomic context.  
391 Moreover, because the interTAD pattern and DEGs of siCTCF were distinct from siRNA of unloaders,  
392 the 3D genome segmentation that is retained after siCTCF, and therefore which is likely to be CTCF  
393 independent, may be an independent mechanism from the extended TADs observed previously with  
394 depletion of unloaders (Haarhuis et al. 2017). How the genomic segmentation within the whole  
395 genome is regulated by (extended) loop extrusion and other mechanisms and whether it is conserved  
396 among cell types and during cell differentiation remain essential questions for future studies.

397

## 398 **METHODS**

### 399 **Cell culture and siRNA**

400 We used the siRNA system for depletion, as the auxin-inducible degradation system reduces  
401 protein levels even in the absence of auxin, which is not suitable as a control (Wutz et al. 2020). RPE  
402 cells (Wendt et al. 2008) were cultured in DMEM (Wako) supplemented with Penicillin-  
403 Streptomycin-L-Glutamine Solution (Wako), 10% fetal bovine serum (Biosera) and 20 mM HEPES-  
404 KOH (pH 7.4). All siRNA transfections were performed using Lipofectamine RNAiMAX (Thermo  
405 Fisher Scientific) in accordance with the manufacturer's protocol 2 or 3 days before sample  
406 preparation, using a final RNA duplex concentration of 50 nM. The siRNA sequences are shown in  
407 Supplementary Table S7 and are the same as those described previously (Deardorff et al. 2012;  
408 Minamino et al. 2015). For inhibition of BET family proteins, cells were treated with JQ1 for 6 h at a



409 1  $\mu$ M final concentration. We labeled JQ1-treated and the corresponding control samples as JQ1(+)  
410 and JQ1(-), respectively.

411

## 412 **Antibodies**

413 Antibodies used for ChIP and immunoblotting were as follows. Antibodies against histone H3  
414 lysine-27 acetylation (H3K27ac) (Stasevich et al. 2014), H3 lysine-4 trimethylation (H3K4me3), H3  
415 lysine-9 trimethylation (H3K9me3), H3 lysine-36 trimethylation (H3K36me3) and Pol2ser2 were  
416 provided by Dr. Kimura (Tokyo Institute of Technology, Tokyo, Japan). We also used antibodies  
417 against Rad21, Smc3ac and ESCO1, which were described previously (Minamino et al. 2015).  
418 Antibodies against NIPBL (A301-779A, BETHYL), Mau2 (ab46906, abcam), CTCF (07-729, Merck),  
419 BRD4 (A301-985A50, BETHYL), AFF4 (A302-538A, BETHYL), Pol2 (14958, Cell signaling  
420 technology) and H3 lysine-27 trimethylation (H3K27me3, ab192985, abcam) were used for ChIP.  
421 Antibodies against NIPBL (sc-374625, Santa Cruz Biotechnology),  $\alpha$ -tubulin (T6074, Merck), WAPL  
422 (16370-1-AP, Proteintech), PDS5A (A300-088A, BETHYL), PDS5B (ab70299, abcam) and CTCF  
423 (3417, Cell signaling technology) were used for immunoblotting. The mouse monoclonal antibody  
424 against Mau2 was generated using a synthetic peptide corresponding to residues 596-613  
425 (PVQFQAQNGPNTSLASLL) of human Mau2 and used for immunoblotting. Antibody dilutions in  
426 immunoblotting were 1:500 (NIPBL and ESCO1) and 1:1,000 (other antibodies).

427

## 428 **Protein analysis**

429 Cells were lysed with lysis buffer (20 mM HEPES-KOH, pH 7.5; 100 mM NaCl; 10 mM  
430 KCl; 10% glycerol; 340 mM sucrose; 1.5 mM MgCl<sub>2</sub>; 10 mM sodium butyrate; 0.25% Triton X-100;  
431 1 mM dithiothreitol; 1 $\times$  cComplete proteinase inhibitor cocktail) as described (Deardorff et al. 2012).  
432 The resulting lysate was mixed with SDS-PAGE sample buffer (50 mM Tris-HCl, pH 6.8; 2% SDS;  
433 0.005% BPB; 7% glycerol; 5% 2-mercaptoethanol) and boiled for 5 min. The proteins were analyzed

434 by Mini-PROTEAN Tetra Vertical Electrophoresis Cell (Bio-Rad) in accordance with the  
435 manufacturer's protocol.

436

#### 437 ***In situ* Hi-C**

438 We used the *in situ* Hi-C protocol as described in Rao *et al.* (Rao *et al.* 2014). In brief,  $\sim 3 \times$   
439  $10^6$  RPE cells were crosslinked with 1% formaldehyde for 10 min at room temperature, followed by  
440 an additional 5 min with 200 mM glycine in phosphate-buffered saline (PBS). Fixed cells were  
441 permeabilized in Hi-C lysis buffer (10 mM Tris-HCl, pH 8.0; 10 mM NaCl; 0.2% Igepal CA630; 1 $\times$   
442 protease inhibitor cocktail [Sigma]) on ice. The cells were treated with 100 U of MboI (New England  
443 Biolabs) for chromatin digestion, and the ends of digested fragments were labeled with biotinylated  
444 nucleotides followed by ligation. After DNA reverse crosslinking and purification, ligated DNA was  
445 sheared to a size of 300–500 bp using a Covaris S2 focused-ultrasonicator (settings: Duty Cycle, 10%;  
446 Intensity, 4; Cycles per Burst, 200; Duration, 55 sec). The ligated junctions were then pulled down  
447 with Dynabeads MyOne Streptavidin T1 beads (Thermo Fisher Scientific). The pulled-down DNA  
448 was end-repaired, ligated to sequencing adaptors, amplified on beads and purified using Nextera Mate  
449 Pair Sample Preparation Kit (Illumina) and Agencourt AMPure XP (Beckman Coulter). DNA was  
450 then sequenced to generate paired-end 150-bp reads using the Illumina HiSeq-2500 or X Ten system.

451

#### 452 **Hi-C data processing with Juicer**

453 Sequenced reads were processed using Juicer version 1.5.7 and Juicer tools version 1.9.9  
454 (Durand *et al.* 2016), and the definition of TADs and loops follows Rao *et al.* (Rao *et al.* 2014). The  
455 detailed steps are as follows: Sequenced paired-end reads were mapped by BWA version 0.7.17 (Li  
456 and Durbin 2009). We generated contact map files with square root vanilla coverage (VC\_SQRT)  
457 normalization. We used 25-kbp resolution maps unless otherwise described. We called TADs using  
458 Arrowhead. Because the obtained TADs can be nested, we also generated a list of non-overlapping

459 TADs by segmenting the genome based on all TAD boundaries. TAD boundaries were defined as  
460 edges for all annotated TADs. Loops were called at 5-kbp, 10-kbp and 25-kbp resolution by  
461 HiCCUPS. To obtain peak-overlapping loops (Figure 2C), we used BEDTools v2.28.0  
462 (<https://bedtools.readthedocs.io/en/latest/>) and extracted loops for which both anchor sites overlapped  
463 with the peaks. CTCF motif analysis was implemented using MotifFinder. High-resolution data that  
464 combined all replicates were generated by *mega.sh* script provided by Juicer. Eigenvector (PC1)  
465 values for compartment analysis were generated with the *eigenvector* command in Juicertools. For  
466 allele-specific Hi-C analysis of chromosome X, we obtained single-nucleotide polymorphism data for  
467 RPE cells from Darrow *et al.* (Darrow *et al.* 2016), which was then converted to genome build hg38  
468 by the liftOver tool (<https://genome-store.ucsc.edu/>). We modified the *diploid.sh* script provided by  
469 Juicer and made interaction map files for active and inactive chromosome X.

470         The samples and mapping statistics are summarized in Tables S1. Since we generated six  
471 replicates as control samples, we merged them into a single high-resolution Hi-C data and used it to  
472 obtain reference data for the TADs, loops and compartment data. For the comparative analysis, we  
473 normalized Hi-C matrices based on the number of mapped reads on each chromosome. Therefore, the  
474 tendency for increases and decreases is relative; that is, increased long-range interactions might be  
475 compensated for by increased short-range interactions (Nora *et al.* 2020). siRad21 and siNIPBL were  
476 most affected by this fact, because almost all TADs and loops were depleted after these treatments.  
477 Therefore, in our analysis, we focused on the variation of depletion effects across samples to capture  
478 the context-specific tendency, rather than translating the biological meaning of increased/decreased  
479 interaction itself.

480

#### 481 **Hi-C data processing with other tools**

482         To evaluate the quality and reproducibility of our Hi-C data, we used  
483 3DChromatin\_ReplicateQC (Yardimci *et al.* 2019), which internally implements QuASAR (Sauria  
484 and Taylor 2017) and HiCRep (Yang *et al.* 2017). Because of the large computational complexity

485 involved, we used only chromosomes 21 and 22 with a 50-kbp bin for the quality evaluation. We  
486 confirmed that all of our Hi-C data had sufficient quality (QuASAR-QC scores > 0.05, Table S1).  
487 HiCRep was used to evaluate the overall similarity of the depletion effects among our Hi-C samples  
488 by calculating a stratum-adjusted correlation coefficient that captures the similarity of chromatin  
489 features including TADs and loops. We used Cooler (Abdennur and Mirny 2020) and cooltools  
490 (<https://cooltools.readthedocs.io/>) for APA plots, averaged TAD plots and saddle plots. The  
491 compartment strength was defined as  $(AA + BB) - 2(AB)$ , where AA, BB and AB indicate the  
492 interaction frequency between compartments A and A, compartments B and B and compartments A  
493 and B, respectively, of the saddle plot. The visualization of Hi-C matrices with ChIP-seq distributions  
494 were visualized using Python.

495

#### 496 **Structured interaction matrix analysis**

497 To explore interactions between specific chromatin features (e.g., ChIP-seq peaks), we used  
498 structured interaction matrix analysis (SIMA) (Lin et al. 2012) implemented in HOMER  
499 (<http://homer.ucsd.edu/homer/>). SIMA assembles information for multiple occurrences of each  
500 feature, providing an overview of Hi-C interactions associated with a genomic feature between each  
501 pair of specified domains. In this study, the genomic features included the ChIP-seq peak list (AFF4,  
502 CTCF, H3K27ac, H3K27me3, H3K36me3, H3K4me3, H3K4me2, Smc3ac, Mau2, Med1, Pol2,  
503 Pol2ser2 and Rad21), differentially expressed genes (DEGs) (siCTCF, siNIPBL, siRad21) and  
504 transcriptional start sites (TSSs). Domains of interest were defined as TAD lists, and the distances  
505 between two TADs were specified to be <5 Mbp, <2 Mbp or 2–<5 Mbp with ‘-max -min’ parameters.  
506 By making comparisons with the background model, we obtained an enrichment score, representing  
507 the degree to which a genomic feature pair was enriched in the Hi-C interactions between two TADs.  
508 To compare differences in enrichment scores between cohesin-knockdown and control Hi-C samples,  
509 we used the paired Wilcoxon signed-rank test to calculate the p-value and effect size for each

510 genomic feature pair, as described (Seitan et al. 2013). We used Cytoscape (Shannon et al. 2003) to  
511 visualize the results.

512

### 513 **Multi-scale insulation score**

514 A multi-scale insulation score was generated as described (Crane et al. 2015). In brief, the  
515 insulation score was calculated at a resolution of 25 kbp as the log-scaled relative contact frequency  
516 across pairs of genomic loci located around the genomic positions from 100 kbp to 1 Mbp. The 500-  
517 kbp distance was used in the insulation score analysis. For the classification of insulation boundaries  
518 into six types, we used the following criteria based on this 500-kbp insulation score:

- 519 1. if( $\text{siNIPBL} - \text{control}$ ) >  $T_{\text{ins}}$  and if( $\text{siCTCF} - \text{control}$ ) >  $T_{\text{ins}}$  : "all-dependent"
- 520 2. else if( $\text{siNIPBL} - \text{control}$ ) >  $T_{\text{ins}}$  or if( $\text{siRad21} - \text{control}$ ) >  $T_{\text{ins}}$  : "cohesin-dependent"
- 521 3. else if( $\text{siCTCF} - \text{control}$ ) >  $T_{\text{ins}}$  : "CTCF-dependent"
- 522 4. else if( $\text{control} - \text{siCTCF}$ ) >  $T_{\text{ins}}$  : "CTCF-separated"
- 523 5. else if( $\text{control} - \text{siNIPBL}$ ) >  $T_{\text{ins}}$  or if( $\text{control} - \text{siRad21}$ ) >  $T_{\text{ins}}$  : "cohesin-separated"
- 524 6. else if( $\text{siNIPBL} - \text{control}$ ) <  $T_{\text{ins}}$  and if( $\text{siCTCF} - \text{control}$ ) <  $T_{\text{ins}}$  and if( $\text{siCTCF} - \text{control}$ ) <  
525  $T_{\text{ins}}$  : "robust"

526 where we set  $T_{\text{ins}}$ , the threshold of insulation score, as 0.13. We excluded siMau2 as a criterion  
527 because it had a smaller effect than siNIPBL and siRad21 on the insulation score. We excluded  
528 chromosomes X and Y and the mitochondrial genome from this boundary analysis. The obtained six  
529 types of boundaries are summarized in Table S5.

530

### 531 **Directional relative frequency (DRF)**

532 DRF measures the bias in the relative interaction frequency ( $T = \log (C_{siRNA}) -$   
533  $\log (C_{control})$ ) between regions up- and downstream of each genomic region, where  $C$  is a  
534 normalized contact matrix. Therefore, the DRF can be calculated by

$$535 \quad DRF_i = \sum_{j=l_{min}}^{l_{max}} T_{i,i+j} - \sum_{j=l_{min}}^{l_{max}} T_{i,i-j},$$

536 where  $l_{min}$  and  $l_{max}$  indicate the range of interaction. In this study, we set  $l_{min} = 500 \text{ kbp}$  and  
537  $l_{max} = 2 \text{ Mbp}$ .

538 To obtain differential DRF regions, we classified Hi-C samples into “cohesin and loaders,”  
539 “cohesin unloaders” and “others (including control)” and calculated the averaged DRF values and a  
540 99% confidence interval (CI). Then we identified the regions that satisfied the following criteria: the  
541 99% CI ranges of “cohesin and loaders” and “others” did not overlap, and the averaged DRF value of  
542 “cohesin and loaders” was  $> T_{DRF}$  or  $< -T_{DRF}$ , where  $T_{DRF}$  refers to the threshold of DRF. We set  $T_{DRF}$   
543  $= 0.7$  in this study. The obtained differential DRF regions are summarized in Table S6.

544

## 545 RNA-seq

546 Total RNA was isolated using Trizol (Thermo Fisher Scientific) and a Nucleospin RNA kit  
547 (Macherey-Nagel). rRNA was removed with the Ribo-Zero Gold rRNA Removal Kit (Illumina),  
548 followed by sequencing library preparation with the NEBNext Ultra Directional RNA Library Prep  
549 Kit for Illumina (New England Biolabs). Single-end 65-bp reads were sequenced by Illumina HiSeq-  
550 2500 system. Sequenced reads were mapped to the human reference sequence (GRCh38) by STAR  
551 version 2.7.3a (Dobin et al. 2013) with the following options "SortedByCoordinate --quantMode  
552 TranscriptomeSAM --outSAMattributes All". The samples and mapping statistics are summarized in  
553 Tables S2. The gene expression levels were estimated by RSEM version 1.3.1 (Li and Dewey 2011)  
554 with the option "--estimate-rspd --strandedness reverse". We used DESeq2 (Love et al. 2014) to

555 identify DEGs (protein-coding genes, false discovery rate [FDR] < 0.01). We focused on protein-  
556 coding genes to avoid the effects of repetitive non-coding RNAs.

557 To mitigate the indirect effect and the technical variances, we generated the list of DEGs by  
558 merging the top-ranked 1,000 DEGs from each pairwise comparison between each siRNA and the  
559 controls. We used clusterProfiler (Yu et al. 2012) for the GO enrichment analysis.

560

### 561 **Spike-in ChIP-seq**

562 Spike-in ChIP-seq enables us to explore the absolute-level difference in read enrichment  
563 among samples (Bonhoure et al. 2014; Nakato and Shirahige 2017). Chromatin preparation for ChIP  
564 was performed as described (Izumi et al. 2015). In brief,  $\sim 8 \times 10^6$  RPE cells were crosslinked with 1%  
565 formaldehyde for 10 min at room temperature, followed by an additional 5 min with glycine in PBS  
566 added at a final concentration of 125 mM. Fixed cells were lysed in LB1 (50 mM HEPES-KOH, pH  
567 7.4; 140 mM NaCl; 1 mM EDTA; 10% glycerol; 0.5% NP-40; 0.25% Triton X-100; 10 mM  
568 dithiothreitol; 1 mM PMSF) on ice. The lysate was washed sequentially with LB2 (20 mM Tris-HCl,  
569 pH 8.0; 200 mM NaCl; 1 mM EDTA; 0.5 mM EGTA; 1 mM PMSF) and LB3 (20 mM Tris-HCl, pH  
570 7.5; 150 mM NaCl; 1 mM EDTA; 0.5 mM EGTA; 1% Triton X-100; 0.1% sodium deoxycholate; 0.1%  
571 SDS;  $1 \times$  cComplete protease inhibitor cocktail [Roche]) on ice. The lysate was resuspended in LB3  
572 and sonicated using Branson Sonifier 250D (Branson) for chromatin shearing (12 sec with amplitude  
573 setting at 17% of the maximum amplitude, six times). In addition, lysate containing fragmented  
574 chromatin was also prepared from  $\sim 2 \times 10^6$  mouse cells (C2C12) with the same procedures. Human  
575 cell lysate and mouse cell lysate (as a spike-in internal control) were combined ( $\sim 4:1$  ratio) and  
576 incubated with protein A or G Dynabeads (Thermo Fisher Scientific) conjugated with the relevant  
577 antibodies for 14 h at 4°C. The beads were then washed five times with cold RIPA wash buffer (50  
578 mM HEPES-KOH, pH 7.4; 500 mM LiCl; 1 mM EDTA; 0.5% sodium deoxycholate; 1% NP-40) and  
579 once with cold TE50 (50 mM Tris-HCl, pH 8.0; 10 mM EDTA). Material captured on the beads was

580 eluted with TE50 containing 1% SDS. The eluted material and input were incubated for 6 h at 65°C to  
581 reverse crosslinks and were treated with 100 ng RNaseA (Roche) for 1 h at 50°C, followed by  
582 treatment with 100 ng Proteinase K (Merck) overnight at 50°C. The input and ChIP DNA were then  
583 purified with a PCR purification kit (Qiagen). DNA from the ChIP and input fractions was end-  
584 repaired, ligated to sequencing adaptors, amplified and size-selected using NEBNext Ultra II DNA  
585 Library Prep Kit for Illumina (New England Biolabs) and Agencourt AMPure XP (Beckman Coulter).  
586 DNA was then sequenced to generate single-end 65-bp reads using the Illumina HiSeq-2500 and  
587 NextSeq 2000 systems.

588 Reads were aligned to the human genome build hg38 and mouse genome build mm10 using  
589 Bowtie2 version 2.4.1 (Langmead and Salzberg 2012) with default parameters. Quality assessment  
590 was performed with SSP version 1.2.2 (Nakato and Shirahige 2018) and DROMPAplus version 1.12.1  
591 (Nakato and Sakata 2020). Spike-in read normalization, peak calling and visualization were  
592 performed with DROMPAplus. The mapping statistics, quality values and the scaling factors for  
593 spike-in normalization are summarized in Table S3. The default parameter set was used for peak  
594 calling (100-bp bin, --pthre\_internal 5, --pthre\_enrich 4) except for H3K9me3 (--pthre\_internal 1 --  
595 pthre\_enrich 2) due to the lower signal-to-noise ratio. For read visualization (Figures 2–4 and 6), we  
596 displayed  $-\log_{10}(p)$  scores of ChIP/input enrichment (--showpenrich 1 option), which is recommended  
597 for distinguishing the signal from the noise (Roadmap Epigenomics et al. 2015). For Figure 7, to look  
598 for significant changes in ChIP-seq data, we similarly compared ChIP (control) and ChIP (siRNA)  
599 and visualized  $-\log_{10}(p)$ .

600

### 601 **Permutation test for overlapping analysis**

602 To compare the overlapping ratio of TSSs of DEGs and ChIP-seq peaks, Hi-C loops and  
603 insulation boundaries, we implemented the permutation test (n = 1,000) that compared the relative  
604 overlap frequency against the background distribution. As a background, we used all DEGs obtained



605 by DESeq2 (11,345 genes, FDR < 0.01) for DEGs, and all boundaries (7,421) for the six types of  
606 boundaries. We randomly picked up the same number of genes or boundaries from the background in  
607 each permutation and generated the frequency distribution. For the boundary analysis (Figure 3E), we  
608 counted DEGs and the peaks that overlapped within 50 kbp of them.

609

## 610 **Correlation of interactions with epigenomes**

611 For interTAD interaction comparisons (Figures 6B–D), we extracted all TAD regions with  
612 widths of >100 kbp and annotated them using the epigenomic marks (H3K36me3, H3K27me3,  
613 H3K9me3 and Pol2) with the following criterion: whether the marks covered > 40.0% of the TAD  
614 length. To avoid a low read coverage at long-range distances and the technical effect derived from the  
615 different resolution of Hi-C matrices, we used the log-fold change  $\log_2(N_{siRNA}/N_{control})$ , where  
616  $N_{siRNA}$  and  $N_{control}$  indicate the total number of fragments mapped within the interTAD regions  
617 between a TAD pair ( $\leq 2$  Mbp in distance) annotated with the epigenomic marks. We calculated the  
618 score for all TAD pairs and applied k-means clustering (k = 5). Then we calculated the z-score–  
619 normalized fraction of epigenomic status for the TAD pairs included in each cluster to estimate the  
620 epigenomic-dependent depletion effect of interTAD interactions.

621

## 622 **Extended ChromHMM**

623 Our previous study showed that several 1D metrics for Hi-C data are effective for annotating  
624 chromatin states in detail (Wang and Nakato 2021). In this study, we added CTCF, boundary and  
625 compartment information in addition to five core histone marks (H3K4me3, K3K27ac, H3K27me3,  
626 H3K36me3 and H3K9me3) to ChromHMM (Ernst and Kellis 2012) and annotated 15 chromatin  
627 states.

628

629 **DATA ACCESS**

630 The raw sequencing data and processed files of Hi-C, RNA-seq and ChIP-seq data from this  
631 study have been submitted to the Gene Expression Omnibus (GEO) under the accession number  
632 GSE196450. Custom code used for the principal analysis is available at Docker Hub  
633 (<https://hub.docker.com/r/rnakato/juicer>) and at GitHub ([https://github.com/rnakato/RPE\\_Hi-](https://github.com/rnakato/RPE_Hi-C_Analysis)  
634 [C\\_Analysis](#)).

635

636 **COMPETING INTEREST STATEMENT**

637 The authors declare no competing interests.

638

639 **ACKNOWLEDGEMENTS**

640 We thank all members of the Nakato and Shirahige Laboratories for discussions and  
641 comments on the manuscript. This work was supported by a Grant-in-Aid for Scientific Research  
642 (17H06331 to R.N. and 15H05970, 20H05686 and 20H05940 to K.S), the Japan Agency for Medical  
643 Research and Development under grant number JP22gm6310012h0003 and the Japan Science and  
644 Technology Agency under grant number JPMJCR18S5.

645

646 **AUTHOR CONTRIBUTIONS**

647 R.N. conceived this project and wrote the manuscript. R.N., J.W., L.A.E.N. and G.M.O.  
648 implemented the computational analysis. T.S. prepared Hi-C, ChIP-seq and RNA-seq samples. M.B.  
649 prepared ChIP-seq and RNA-seq samples. K.S. supervised the sample preparation and sequencing and  
650 suggested ways to improve the analysis and the manuscript.

651

652 **REFERENCES**

- 653 Abdennur N, Mirny LA. 2020. Cooler: scalable storage for Hi-C data and other genomically labeled  
654 arrays. *Bioinformatics* **36**: 311-316.
- 655 Allahyar A, Vermeulen C, Bouwman BAM, Krijger PHL, Verstegen M, Geeven G, van Kranenburg  
656 M, Pieterse M, Straver R, Haarhuis JHI et al. 2018. Enhancer hubs and loop collisions  
657 identified from single-allele topologies. *Nat Genet* **50**: 1151-1160.
- 658 Bonev B, Cavalli G. 2016. Organization and function of the 3D genome. *Nat Rev Genet* **17**: 772.
- 659 Bonev B, Mendelson Cohen N, Szabo Q, Fritsch L, Papadopoulos GL, Lubling Y, Xu X, Lv X,  
660 Hugnot JP, Tanay A et al. 2017. Multiscale 3D Genome Rewiring during Mouse Neural  
661 Development. *Cell* **171**: 557-572 e524.
- 662 Bonhoure N, Bounova G, Bernasconi D, Praz V, Lammers F, Canella D, Willis IM, Herr W,  
663 Hernandez N, Delorenzi M et al. 2014. Quantifying ChIP-seq data: a spiking method  
664 providing an internal reference for sample-to-sample normalization. *Genome research* **24**:  
665 1157-1168.
- 666 Busslinger GA, Stocsits RR, van der Lelij P, Axelsson E, Tedeschi A, Galjart N, Peters JM. 2017.  
667 Cohesin is positioned in mammalian genomes by transcription, CTCF and Wapl. *Nature* **544**:  
668 503-507.
- 669 Crane E, Bian Q, McCord RP, Lajoie BR, Wheeler BS, Ralston EJ, Uzawa S, Dekker J, Meyer BJ.  
670 2015. Condensin-driven remodelling of X chromosome topology during dosage compensation.  
671 *Nature* **523**: 240-244.
- 672 Crump NT, Ballabio E, Godfrey L, Thorne R, Repapi E, Kerry J, Tapia M, Hua P, Lagerholm C,  
673 Filippakopoulos P et al. 2021. BET inhibition disrupts transcription but retains enhancer-  
674 promoter contact. *Nat Commun* **12**: 223.
- 675 Darrow EM, Huntley MH, Dudchenko O, Stamenova EK, Durand NC, Sun Z, Huang SC, Sanborn  
676 AL, Machol I, Shamim M et al. 2016. Deletion of DXZ4 on the human inactive X  
677 chromosome alters higher-order genome architecture. *Proc Natl Acad Sci U S A* **113**: E4504-  
678 4512.

- 679 Davidson IF, Bauer B, Goetz D, Tang W, Wutz G, Peters JM. 2019. DNA loop extrusion by human  
680 cohesin. *Science* **366**: 1338-1345.
- 681 Deardorff MA, Bando M, Nakato R, Watrin E, Itoh T, Minamino M, Saitoh K, Komata M, Katou Y,  
682 Clark D et al. 2012. HDAC8 mutations in Cornelia de Lange syndrome affect the cohesin  
683 acetylation cycle. *Nature* **489**: 313-317.
- 684 Dixon JR, Selvaraj S, Yue F, Kim A, Li Y, Shen Y, Hu M, Liu JS, Ren B. 2012. Topological domains  
685 in mammalian genomes identified by analysis of chromatin interactions. *Nature* **485**: 376-380.
- 686 Dobin A, Davis CA, Schlesinger F, Drenkow J, Zaleski C, Jha S, Batut P, Chaisson M, Gingeras TR.  
687 2013. STAR: ultrafast universal RNA-seq aligner. *Bioinformatics* **29**: 15-21.
- 688 Durand NC, Shamim MS, Machol I, Rao SS, Huntley MH, Lander ES, Aiden EL. 2016. Juicer  
689 Provides a One-Click System for Analyzing Loop-Resolution Hi-C Experiments. *Cell Syst* **3**:  
690 95-98.
- 691 Ernst J, Kellis M. 2012. ChromHMM: automating chromatin-state discovery and characterization. *Nat*  
692 *Methods* **9**: 215-216.
- 693 Faure AJ, Schmidt D, Watt S, Schwalie PC, Wilson MD, Xu H, Ramsay RG, Odom DT, Flicek P.  
694 2012. Cohesin regulates tissue-specific expression by stabilizing highly occupied cis-  
695 regulatory modules. *Genome research* **22**: 2163-2175.
- 696 Fudenberg G, Imakaev M, Lu C, Goloborodko A, Abdennur N, Mirny LA. 2016. Formation of  
697 Chromosomal Domains by Loop Extrusion. *Cell reports* **15**: 2038-2049.
- 698 Ghavi-Helm Y, Jankowski A, Meiers S, Viales RR, Korbel JO, Furlong EEM. 2019. Highly  
699 rearranged chromosomes reveal uncoupling between genome topology and gene expression.  
700 *Nat Genet* **51**: 1272-1282.
- 701 Haarhuis JHI, van der Weide RH, Blomen VA, Yanez-Cuna JO, Amendola M, van Ruiten MS,  
702 Krijger PHL, Teunissen H, Medema RH, van Steensel B et al. 2017. The Cohesin Release  
703 Factor WAPL Restricts Chromatin Loop Extension. *Cell* **169**: 693-707 e614.
- 704 Hansen AS. 2020. CTCF as a boundary factor for cohesin-mediated loop extrusion: evidence for a  
705 multi-step mechanism. *Nucleus* **11**: 132-148.

- 706 Izumi K, Nakato R, Zhang Z, Edmondson AC, Noon S, Dulik MC, Rajagopalan R, Venditti CP,  
707 Gripp K, Samanich J et al. 2015. Germline gain-of-function mutations in *AFF4* cause a  
708 developmental syndrome functionally linking the super elongation complex and cohesin. *Nat*  
709 *Genet* **47**: 338-344.
- 710 Kagey MH, Newman JJ, Bilodeau S, Zhan Y, Orlando DA, van Berkum NL, Ebmeier CC, Goossens J,  
711 Rahl PB, Levine SS et al. 2010. Mediator and cohesin connect gene expression and chromatin  
712 architecture. *Nature* **467**: 430-435.
- 713 Kim Y, Shi Z, Zhang H, Finkelstein IJ, Yu H. 2019. Human cohesin compacts DNA by loop extrusion.  
714 *Science* **366**: 1345-1349.
- 715 Kline AD, Moss JF, Selicorni A, Bisgaard AM, Deardorff MA, Gillett PM, Ishman SL, Kerr LM,  
716 Levin AV, Mulder PA et al. 2018. Diagnosis and management of Cornelia de Lange  
717 syndrome: first international consensus statement. *Nat Rev Genet* **19**: 649-666.
- 718 Kriz AJ, Colognori D, Sunwoo H, Nabet B, Lee JT. 2021. Balancing cohesin eviction and retention  
719 prevents aberrant chromosomal interactions, Polycomb-mediated repression, and X-  
720 inactivation. *Mol Cell* **81**: 1970-1987 e1979.
- 721 Langmead B, Salzberg SL. 2012. Fast gapped-read alignment with Bowtie 2. *Nat Methods* **9**: 357-359.
- 722 Li B, Dewey CN. 2011. RSEM: accurate transcript quantification from RNA-Seq data with or without  
723 a reference genome. *BMC bioinformatics* **12**: 323.
- 724 Li H, Durbin R. 2009. Fast and accurate short read alignment with Burrows-Wheeler transform.  
725 *Bioinformatics* **25**: 1754-1760.
- 726 Lieberman-Aiden E, van Berkum NL, Williams L, Imakaev M, Ragoczy T, Telling A, Amit I, Lajoie  
727 BR, Sabo PJ, Dorschner MO et al. 2009. Comprehensive mapping of long-range interactions  
728 reveals folding principles of the human genome. *Science* **326**: 289-293.
- 729 Lin YC, Benner C, Mansson R, Heinz S, Miyazaki K, Miyazaki M, Chandra V, Bossen C, Glass CK,  
730 Murre C. 2012. Global changes in the nuclear positioning of genes and intra- and interdomain  
731 genomic interactions that orchestrate B cell fate. *Nat Immunol* **13**: 1196-1204.

- 732 Love MI, Huber W, Anders S. 2014. Moderated estimation of fold change and dispersion for RNA-  
733 seq data with DESeq2. *Genome Biol* **15**: 550.
- 734 Merckenschlager M, Nora EP. 2016. CTCF and Cohesin in Genome Folding and Transcriptional Gene  
735 Regulation. *Annu Rev Genomics Hum Genet* **17**: 17-43.
- 736 Minamino M, Ishibashi M, Nakato R, Akiyama K, Tanaka H, Kato Y, Negishi L, Hirota T, Sutani T,  
737 Bando M et al. 2015. Esco1 Acetylates Cohesin via a Mechanism Different from That of  
738 Esco2. *Curr Biol* **25**: 1694-1706.
- 739 Nakato R, Sakata T. 2020. Methods for ChIP-seq analysis: A practical workflow and advanced  
740 applications. *Methods* doi:10.1016/j.ymeth.2020.03.005.
- 741 Nakato R, Shirahige K. 2017. Recent advances in ChIP-seq analysis: from quality management to  
742 whole-genome annotation. *Brief Bioinform* **18**: 279-290.
- 743 Nakato R, Shirahige K. 2018. Sensitive and robust assessment of ChIP-seq read distribution using a  
744 strand-shift profile. *Bioinformatics* **34**: 2356-2363.
- 745 Nora EP, Caccianini L, Fudenberg G, So K, Kameswaran V, Nagle A, Uebersohn A, Hajj B, Saux AL,  
746 Coulon A et al. 2020. Molecular basis of CTCF binding polarity in genome folding. *Nat*  
747 *Commun* **11**: 5612.
- 748 Nora EP, Goloborodko A, Valton AL, Gibcus JH, Uebersohn A, Abdennur N, Dekker J, Mirny LA,  
749 Bruneau BG. 2017. Targeted Degradation of CTCF Decouples Local Insulation of  
750 Chromosome Domains from Genomic Compartmentalization. *Cell* **169**: 930-944 e922.
- 751 Olley G, Ansari M, Bengani H, Grimes GR, Rhodes J, von Kriegsheim A, Blatnik A, Stewart FJ,  
752 Wakeling E, Carroll N et al. 2018. BRD4 interacts with NIPBL and BRD4 is mutated in a  
753 Cornelia de Lange-like syndrome. *Nat Genet* **50**: 329-332.
- 754 Rao SS, Huntley MH, Durand NC, Stamenova EK, Bochkov ID, Robinson JT, Sanborn AL, Machol I,  
755 Omer AD, Lander ES et al. 2014. A 3D map of the human genome at kilobase resolution  
756 reveals principles of chromatin looping. *Cell* **159**: 1665-1680.

- 757 Rao SSP, Huang SC, Glenn St Hilaire B, Engreitz JM, Perez EM, Kieffer-Kwon KR, Sanborn AL,  
758 Johnstone SE, Bascom GD, Bochkov ID et al. 2017. Cohesin Loss Eliminates All Loop  
759 Domains. *Cell* **171**: 305-320 e324.
- 760 Roadmap Epigenomics C, Kundaje A, Meuleman W, Ernst J, Bilenky M, Yen A, Heravi-Moussavi A,  
761 Kheradpour P, Zhang Z, Wang J et al. 2015. Integrative analysis of 111 reference human  
762 epigenomes. *Nature* **518**: 317-330.
- 763 Sauria MEG, Taylor J. 2017. QuASAR: Quality Assessment of Spatial Arrangement Reproducibility  
764 in Hi-C Data. *bioRxiv (preprint)* doi:10.1101/204438.
- 765 Schmidt D, Schwalie PC, Ross-Innes CS, Hurtado A, Brown GD, Carroll JS, Flicek P, Odom DT.  
766 2010. A CTCF-independent role for cohesin in tissue-specific transcription. *Genome research*  
767 **20**: 578-588.
- 768 Schwarzer W, Abdennur N, Goloborodko A, Pekowska A, Fudenberg G, Loe-Mie Y, Fonseca NA,  
769 Huber W, Haering CH, Mirny L et al. 2017. Two independent modes of chromatin  
770 organization revealed by cohesin removal. *Nature* **551**: 51-56.
- 771 Seitan VC, Faure AJ, Zhan Y, McCord RP, Lajoie BR, Ing-Simmons E, Lenhard B, Giorgetti L,  
772 Heard E, Fisher AG et al. 2013. Cohesin-based chromatin interactions enable regulated gene  
773 expression within preexisting architectural compartments. *Genome research* **23**: 2066-2077.
- 774 Shannon P, Markiel A, Ozier O, Baliga NS, Wang JT, Ramage D, Amin N, Schwikowski B, Ideker T.  
775 2003. Cytoscape: a software environment for integrated models of biomolecular interaction  
776 networks. *Genome research* **13**: 2498-2504.
- 777 Sikorska N, Sexton T. 2020. Defining Functionally Relevant Spatial Chromatin Domains: It is a TAD  
778 Complicated. *J Mol Biol* **432**: 653-664.
- 779 Stasevich TJ, Hayashi-Takanaka Y, Sato Y, Maehara K, Ohkawa Y, Sakata-Sogawa K, Tokunaga M,  
780 Nagase T, Nozaki N, McNally JG et al. 2014. Regulation of RNA polymerase II activation by  
781 histone acetylation in single living cells. *Nature* **516**: 272-275.
- 782 Strom AR, Emelyanov AV, Mir M, Fyodorov DV, Darzacq X, Karpen GH. 2017. Phase separation  
783 drives heterochromatin domain formation. *Nature* **547**: 241-245.

- 784 van Ruiten MS, Rowland BD. 2018. SMC Complexes: Universal DNA Looping Machines with  
785 Distinct Regulators. *Trends Genet* **34**: 477-487.
- 786 Vian L, Pekowska A, Rao SSP, Kieffer-Kwon KR, Jung S, Baranello L, Huang SC, El Khattabi L,  
787 Dose M, Pruett N et al. 2018. The Energetics and Physiological Impact of Cohesin Extrusion.  
788 *Cell* **173**: 1165-1178 e1120.
- 789 Vietri Rudan M, Barrington C, Henderson S, Ernst C, Odom DT, Tanay A, Hadjur S. 2015.  
790 Comparative Hi-C reveals that CTCF underlies evolution of chromosomal domain  
791 architecture. *Cell reports* **10**: 1297-1309.
- 792 Waizenegger IC, Hauf S, Meinke A, Peters JM. 2000. Two distinct pathways remove mammalian  
793 cohesin from chromosome arms in prophase and from centromeres in anaphase. *Cell* **103**:  
794 399-410.
- 795 Wang CY, Jegu T, Chu HP, Oh HJ, Lee JT. 2018. SMCHD1 Merges Chromosome Compartments and  
796 Assists Formation of Super-Structures on the Inactive X. *Cell* **174**: 406-421 e425.
- 797 Wang J, Nakato R. 2021. HiC1Dmetrics: framework to extract various one-dimensional features from  
798 chromosome structure data. *Brief Bioinform* doi:10.1093/bib/bbab509.
- 799 Wendt KS, Yoshida K, Itoh T, Bando M, Koch B, Schirghuber E, Tsutsumi S, Nagae G, Ishihara K,  
800 Mishiro T et al. 2008. Cohesin mediates transcriptional insulation by CCCTC-binding factor.  
801 *Nature* **451**: 796-801.
- 802 Wutz G, Ladurner R, St Hilaire BG, Stocsits RR, Nagasaka K, Pignard B, Sanborn A, Tang W,  
803 Varnai C, Ivanov MP et al. 2020. ESCO1 and CTCF enable formation of long chromatin  
804 loops by protecting cohesin(STAG1) from WAPL. *Elife* **9**.
- 805 Wutz G, Varnai C, Nagasaka K, Cisneros DA, Stocsits RR, Tang W, Schoenfelder S, Jessberger G,  
806 Muhar M, Hossain MJ et al. 2017. Topologically associating domains and chromatin loops  
807 depend on cohesin and are regulated by CTCF, WAPL, and PDS5 proteins. *EMBO J* **36**:  
808 3573-3599.
- 809 Yaffe E, Tanay A. 2011. Probabilistic modeling of Hi-C contact maps eliminates systematic biases to  
810 characterize global chromosomal architecture. *Nat Genet* **43**: 1059-1065.



- 811 Yang T, Zhang F, Yardimci GG, Song F, Hardison RC, Noble WS, Yue F, Li Q. 2017. HiCRep:  
812 assessing the reproducibility of Hi-C data using a stratum-adjusted correlation coefficient.  
813 *Genome research* **27**: 1939-1949.
- 814 Yardimci GG, Ozadam H, Sauria MEG, Ursu O, Yan KK, Yang T, Chakraborty A, Kaul A, Lajoie  
815 BR, Song F et al. 2019. Measuring the reproducibility and quality of Hi-C data. *Genome Biol*  
816 **20**: 57.
- 817 Yu G, Wang LG, Han Y, He QY. 2012. clusterProfiler: an R package for comparing biological  
818 themes among gene clusters. *OMICS* **16**: 284-287.
- 819

820 **FIGURE LEGENDS**

821

822 **Figure 1.** Comparative Hi-C analysis to explore the variation of depletion effects. **(A)** Summary of  
823 protein targets (left) and immunoblots after 72 h of siRNA (right). **(B)** Aggregate peak analysis (APA)  
824 of loops. **(C)** Correlation heatmap among samples based on stratum-adjusted correlation coefficients.  
825 **(D)** Normalized Hi-C matrix of a representative chromosomal region (chromosome 21, 26.0–29.0  
826 Mb). **(E)** The number of TADs, loops, APA strength (observed/expected ratio of the center) and  
827 compartment strength (from saddle plots, see also Figure S2B). The dots indicate the Hi-C samples  
828 (including different treatment times). **(F)** Relative contact probability for the likelihood of a contact at  
829 increasing length scales (averaged by replicates). **(G)** Loop length distribution.

830

831 **Figure 2.** Comparative analysis of siRNA effects on the transcriptome and epigenome. **(A)** Left:  
832 Number of DEGs for each siRNA treatment (FDR < 0.01). Right: Correlation heatmap based on the  
833 Simpson index (showing overlap among top-ranked 1,000 DEGs) for all sample pairs. **(B)** Clustering  
834 of all top-ranked DEGs (rows) and samples (columns) based on the overlap of up- and downregulated  
835 genes. The significant GO terms are also shown (left). See Figure S5 for the full list of GO terms. **(C)**  
836 Log-scale relative enrichment of ChIP-seq peaks (left) and Hi-C loops (right) at the TSSs of DEGs in  
837 the clusters corresponding to **(B)** against all DEGs. \* $p < 0.01$ , the permutation test ( $n = 1,000$ ). **(D)**  
838 ChIP-seq distribution ( $-\log_{10}(p)$ , 100-bp bin) among top-ranked DEGs (*BMP6*, *SSBP2* and  
839 *TNFRSF19*). The significantly enriched regions ( $p < 10^{-4}$ ) are highlighted in red. Red and black  
840 arrows (bottom) indicate CTCF-independent and -dependent Rad21 peaks, respectively. **(E)** The  
841 relative enrichment of Rad21 peaks after depletions and Smc3ac around genes, as compared with  
842 Rad21 (control). \*:  $p < 0.001$ ; \*\*:  $p < 0.0001$ , Fisher exact test against control.

843

844 **Figure 3.** Multi-scale insulation scores reveal the diversity of insulation perturbation at TAD  
845 boundaries. **(A-B)** A representative chromosomal region (chromosome 21, 24.0–32.0 Mb). **(A)**  
846 Normalized Hi-C matrices. Black dashed lines and blue circles indicate TADs and loops, respectively.  
847 **(B)** Top: ChIP-seq distribution ( $-\log_{10}(p)$ , 5-kbp bin). Red regions:  $p < 10^{-3}$ . Middle: Multi-scale  
848 insulation scores. Red regions indicate insulated regions (boundaries). The numbers along the bottom  
849 (i–iv) indicate four of the six boundary types (see text). The red rectangle indicates the long-range  
850 insulation boundaries present after siNIPBL. Bottom: Compartment PC1 and labeled TADs. **(C)**  
851 Insulation score distribution for six types of boundaries. The number in parentheses below each  
852 boundary type indicates the number of boundaries. **(D)** The proportion of boundaries located between  
853 compartments A and B (A-B) or within compartments A (A-A) and B (B-B). **(E)** Relative enrichment  
854 of DEGs (top), loops (middle), ChIP-seq peaks (lower middle) and broad histone enrichment (bottom)  
855 that overlap the six boundary types and intraTAD regions for compartments A and B against all  
856 boundaries. For broad histone marks (bottom), we calculated the fraction of regions covered by the  
857 obtained peaks. \* $p < 0.01$ , the permutation test ( $n = 1,000$ ).

858

859 **Figure 4.** InterTAD-level insulation is increased by cohesin loss. **(A)** Relative enrichment of the  
860 interaction frequency (log scale) relative to control. The region and TAD labels (A1–A5, B1 and B2)  
861 are as in Figures 3A and 3B. See Figure S7A for all samples. **(B)** Top: Schematic illustration of DRF.  
862 Middle: Heatmap of DRF for depletions (row) at the same region with **(A)**. Bottom: Averaged DRF of  
863 cohesin and loaders (red), unloaders (blue) and others (black). The shaded regions indicate the 99%  
864 confidence interval. The purple bars indicate the identified differential DRF regions. **(C)** Examples of  
865 differential DRF regions. Top: Normalized Hi-C matrix (control) and relative interaction frequency  
866 after depletions. The dashed black triangles indicate TADs in the control sample. Bottom:  
867 Compartment PC1 and ChIP-seq distribution ( $-\log_{10}(p)$ , 5-kbp bin). **(D)** Compartment PC1 of the  
868 control and siNIPBL sample centered on 241 differential DRF regions. Rows were ordered using  
869 hierarchical clustering based on the control sample. **(E)** The cosine similarity distribution of the

870 relative frequency in all 241 differential DRF regions (~2 Mbp from the center of each region). See  
871 Figure S7B for all comparisons.

872

873 **Figure 5.** The depletion effect on long-range interactions was different between siRad21 and siNIPBL.  
874 **(A)** SIMA analysis after siRNA. See Figure S8A for all samples. **(B)** Relative interaction frequency  
875 and compartment PC1 (chromosome 15, 38–101 Mb).

876

877 **Figure 6.** InterTAD interaction variation as compared with epigenomic marks. **(A)** Three example  
878 chromosomal regions of increased interactions only in siRad21. Top: Relative frequency and  
879 compartment PC1. Bottom: ChIP-seq distribution ( $-\log_{10}(p)$ , 5-kbp bin). **(B-D)** K-means clustering ( $k$   
880 = 5) of all TAD pairs based on the depletion effect on interactions between them **(B)**, distribution of  
881 depletion effects on the clusters **(C)**, and fraction of the epigenomic state of TAD pairs included in the  
882 clusters **(D)**.

883

884 **Figure 7.** Cohesin was broadly enriched in compartment A but was not enriched in compartment B.  
885 **(A)** The depletion effect distribution from ChIP-seq data ( $-\log_{10}(p)$ , control/siRNA, 5-kbp bin) on  
886 chromosome 21, 24–32 Mbp. The colored bars (bottom) indicate the four compartment types (red,  
887 StrongA; yellow, WeakA; green, WeakB; blue, StrongB). **(B)** A graphical representation of the four  
888 compartments. **(C)** The  $-\log_{10}(p)$  distribution for the depletion effect of siNIPBL and siCTCF on  
889 Rad21 ChIP-seq in the four compartments. **(D)** siRad21 had less of an effect on StrongB TADs (black  
890 rectangles). The region is the same with **(A)**. **(E)** Averaged interactions (observed/expected) in  
891 StrongA and StrongB TADs for representative samples.

**Figure 1**

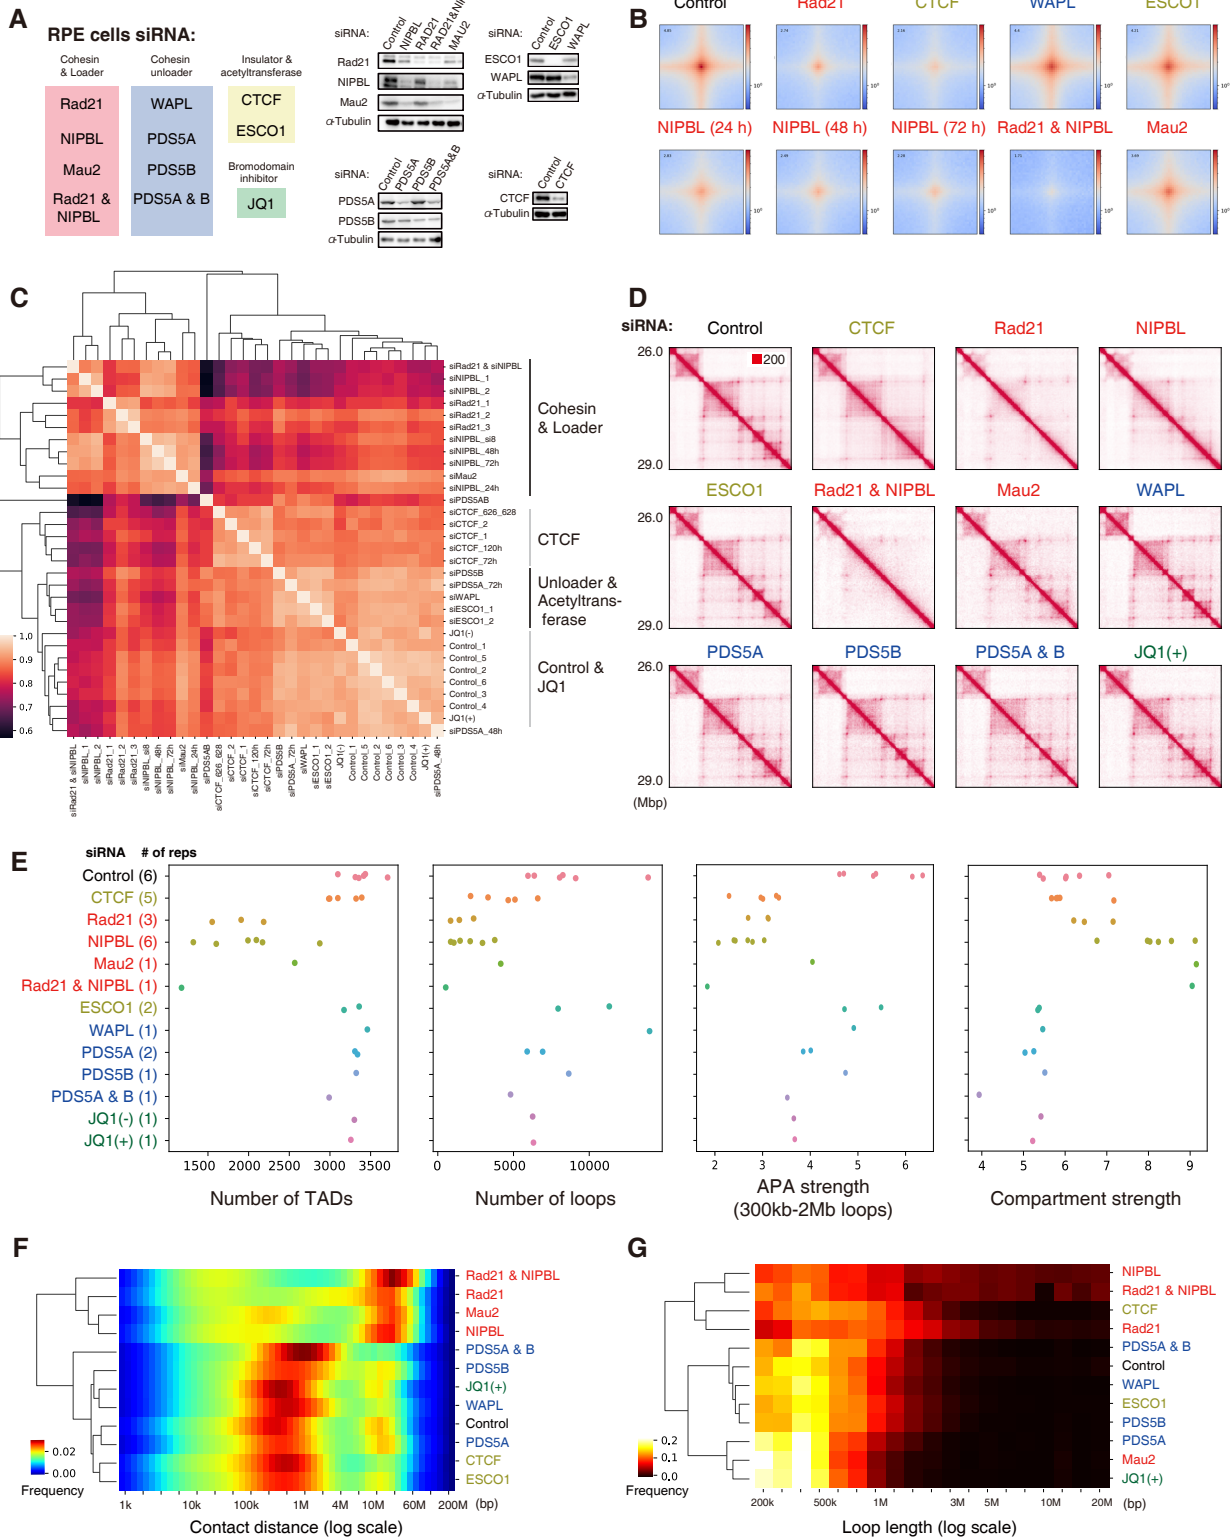

**Figure 2**

**A**

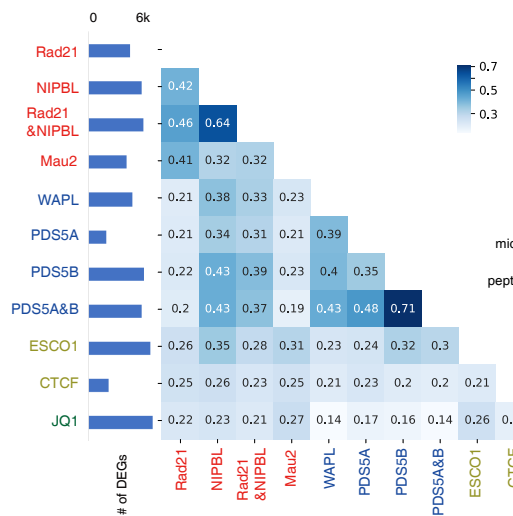

**B**

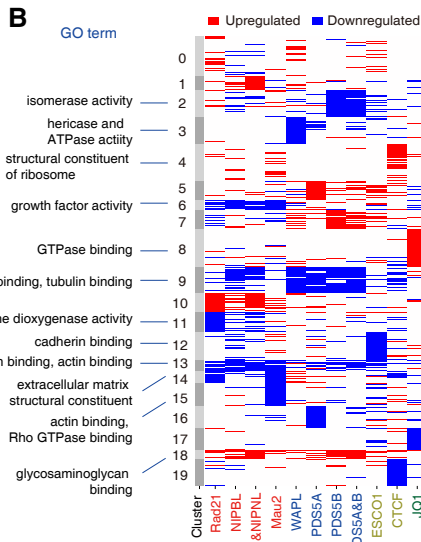

**C**

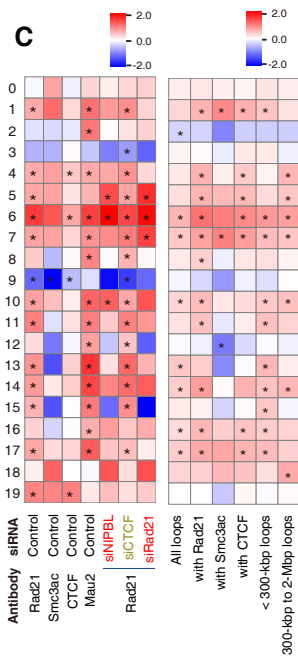

**D**

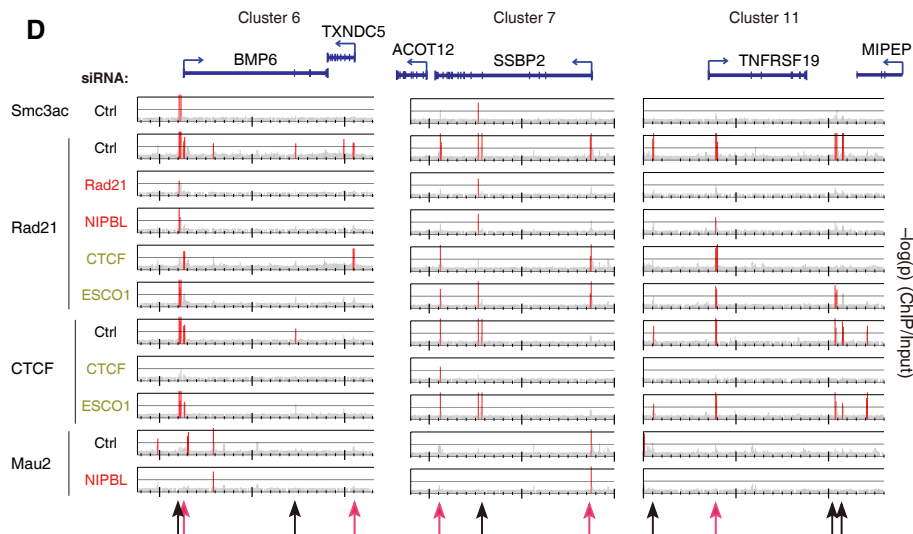

**E**

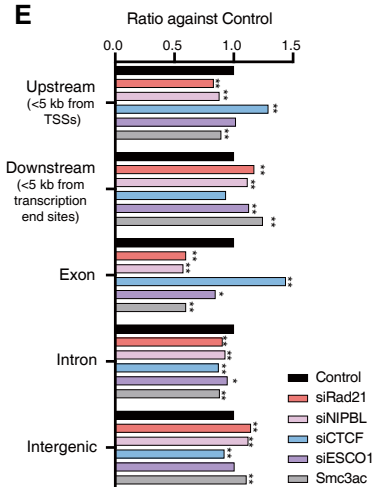

**Figure 3**

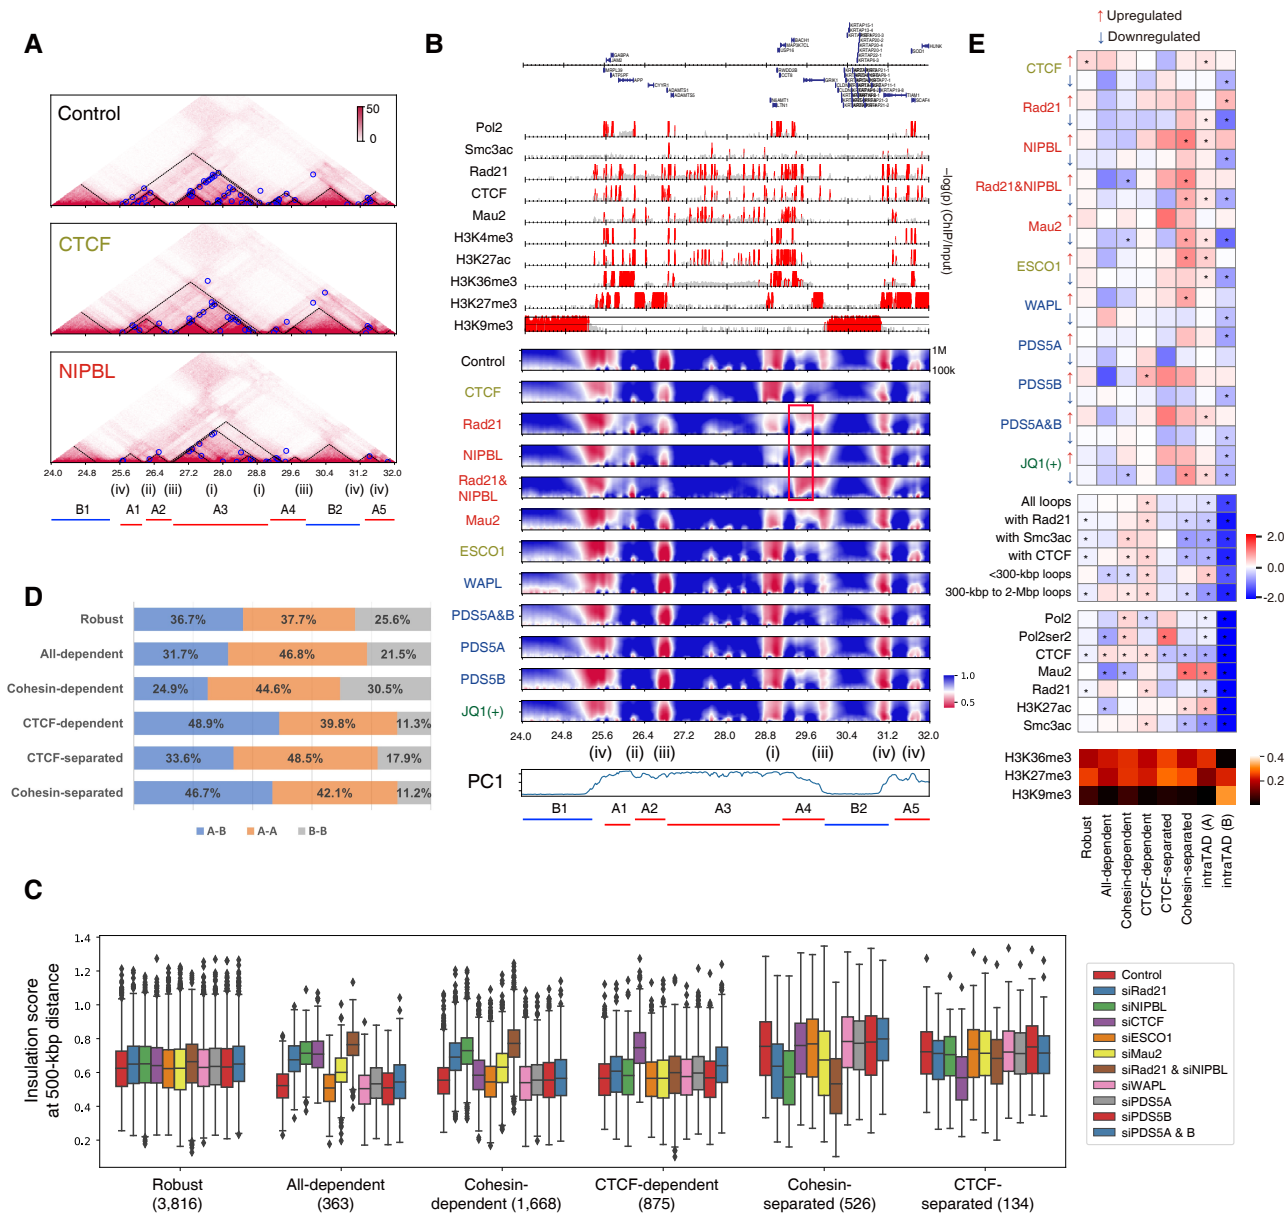

**Figure 4**

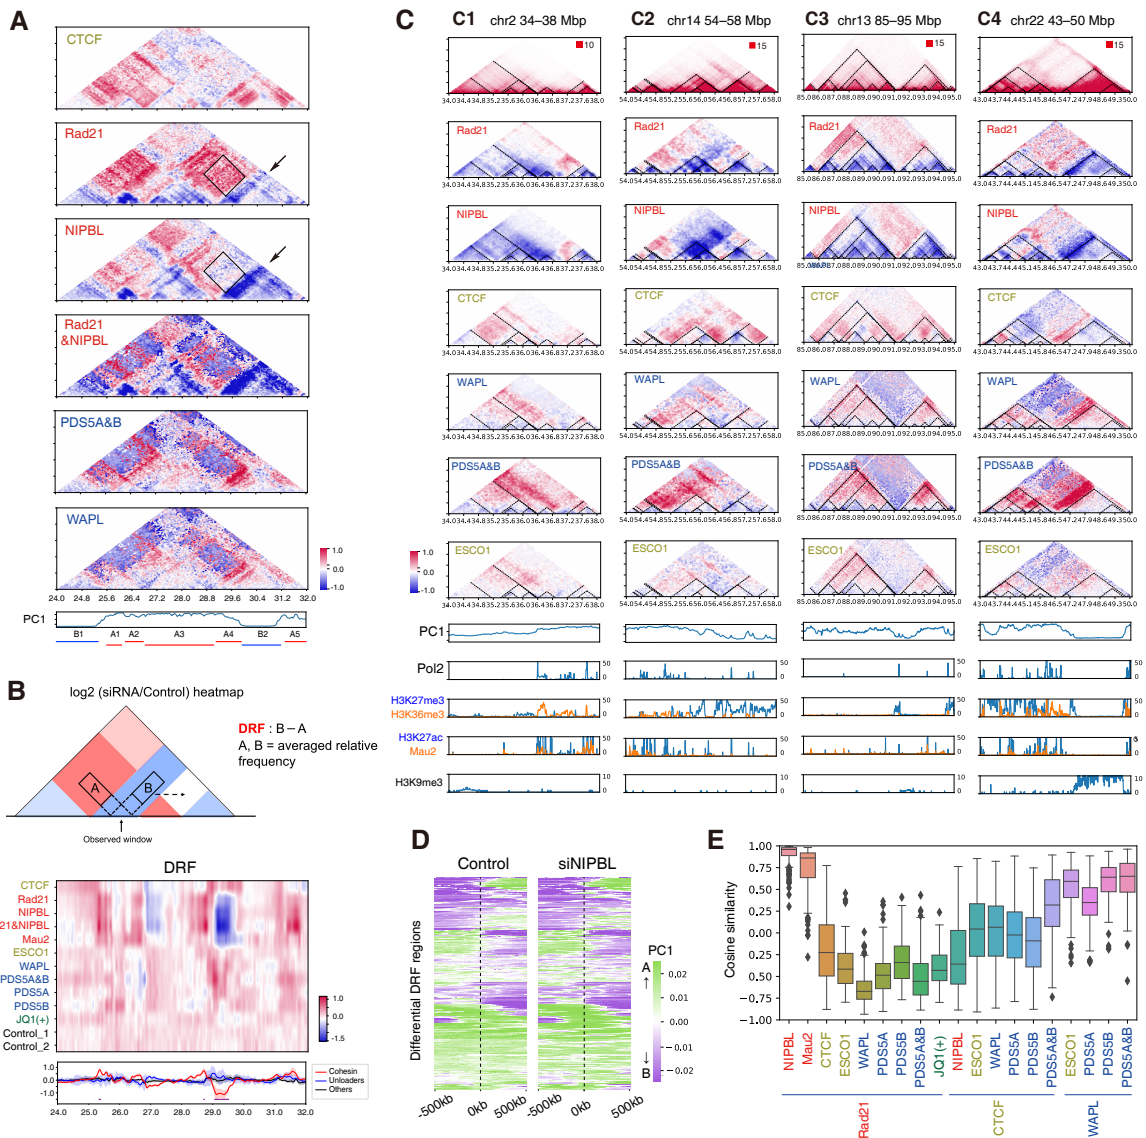



**Figure 5****A**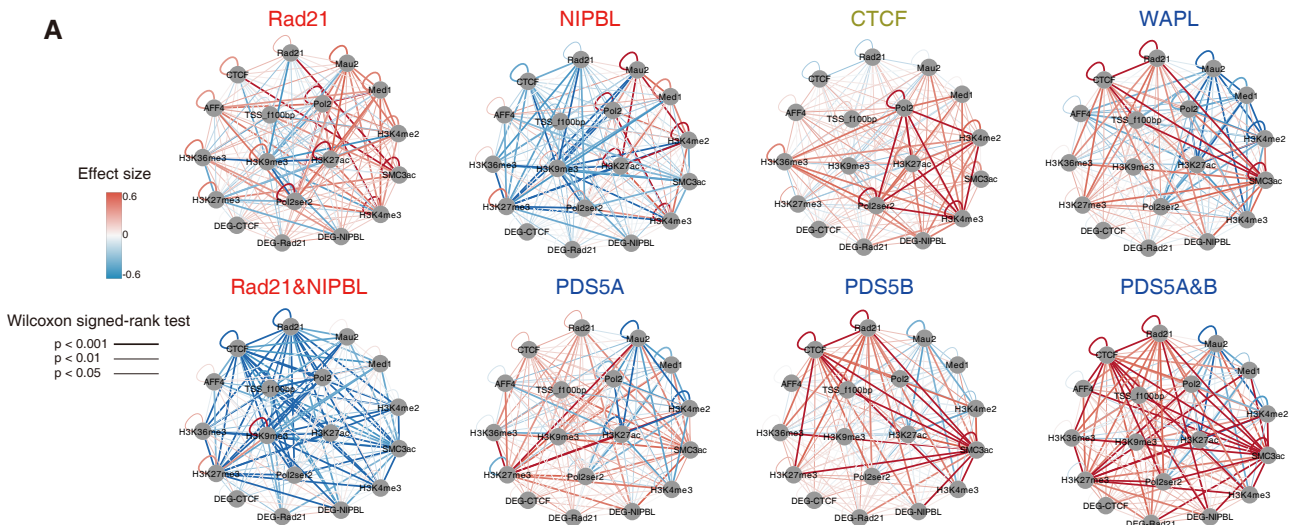**B**

chr15 38–101 Mbp

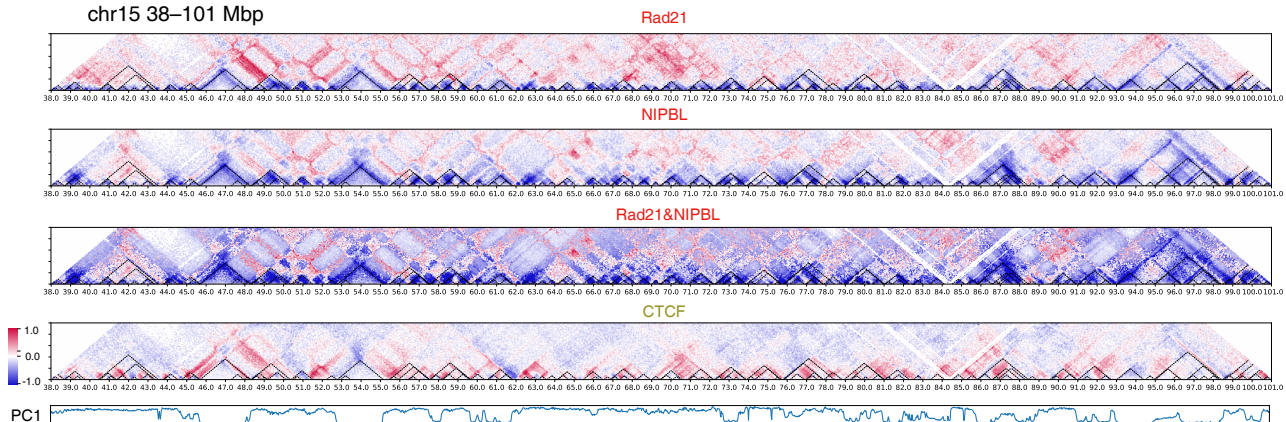

**Figure 6**

**A**

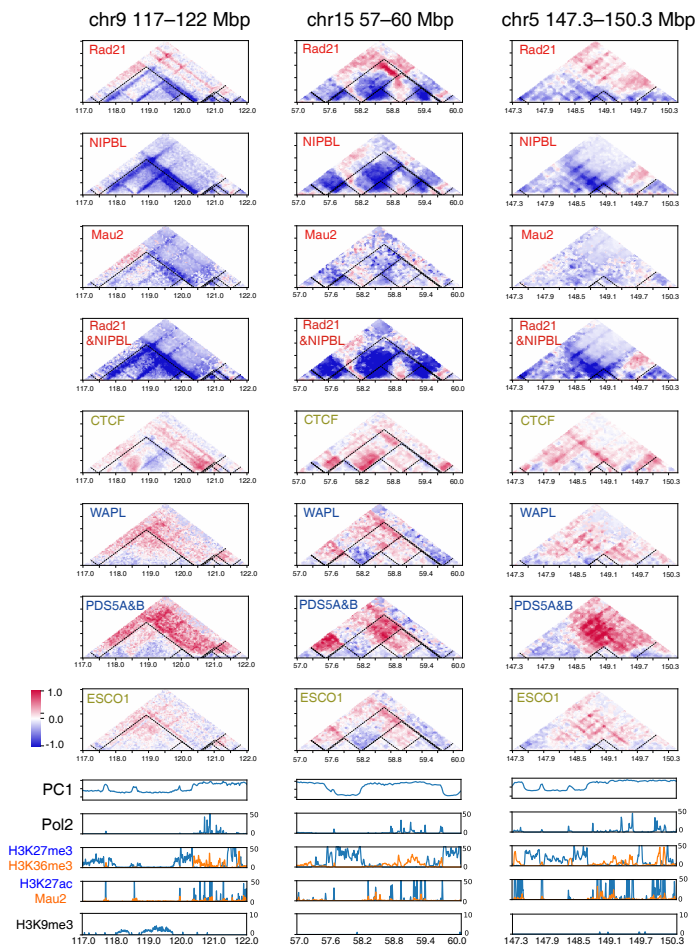

**B**

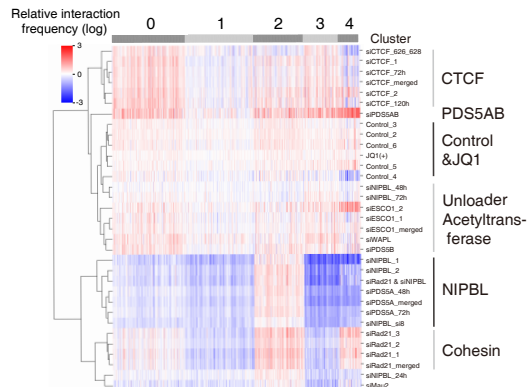

**C**

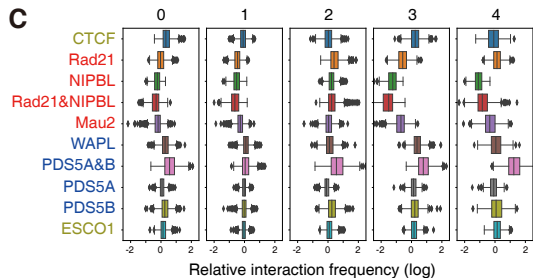

**D**

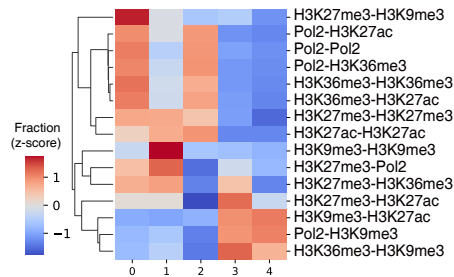

**Figure 7**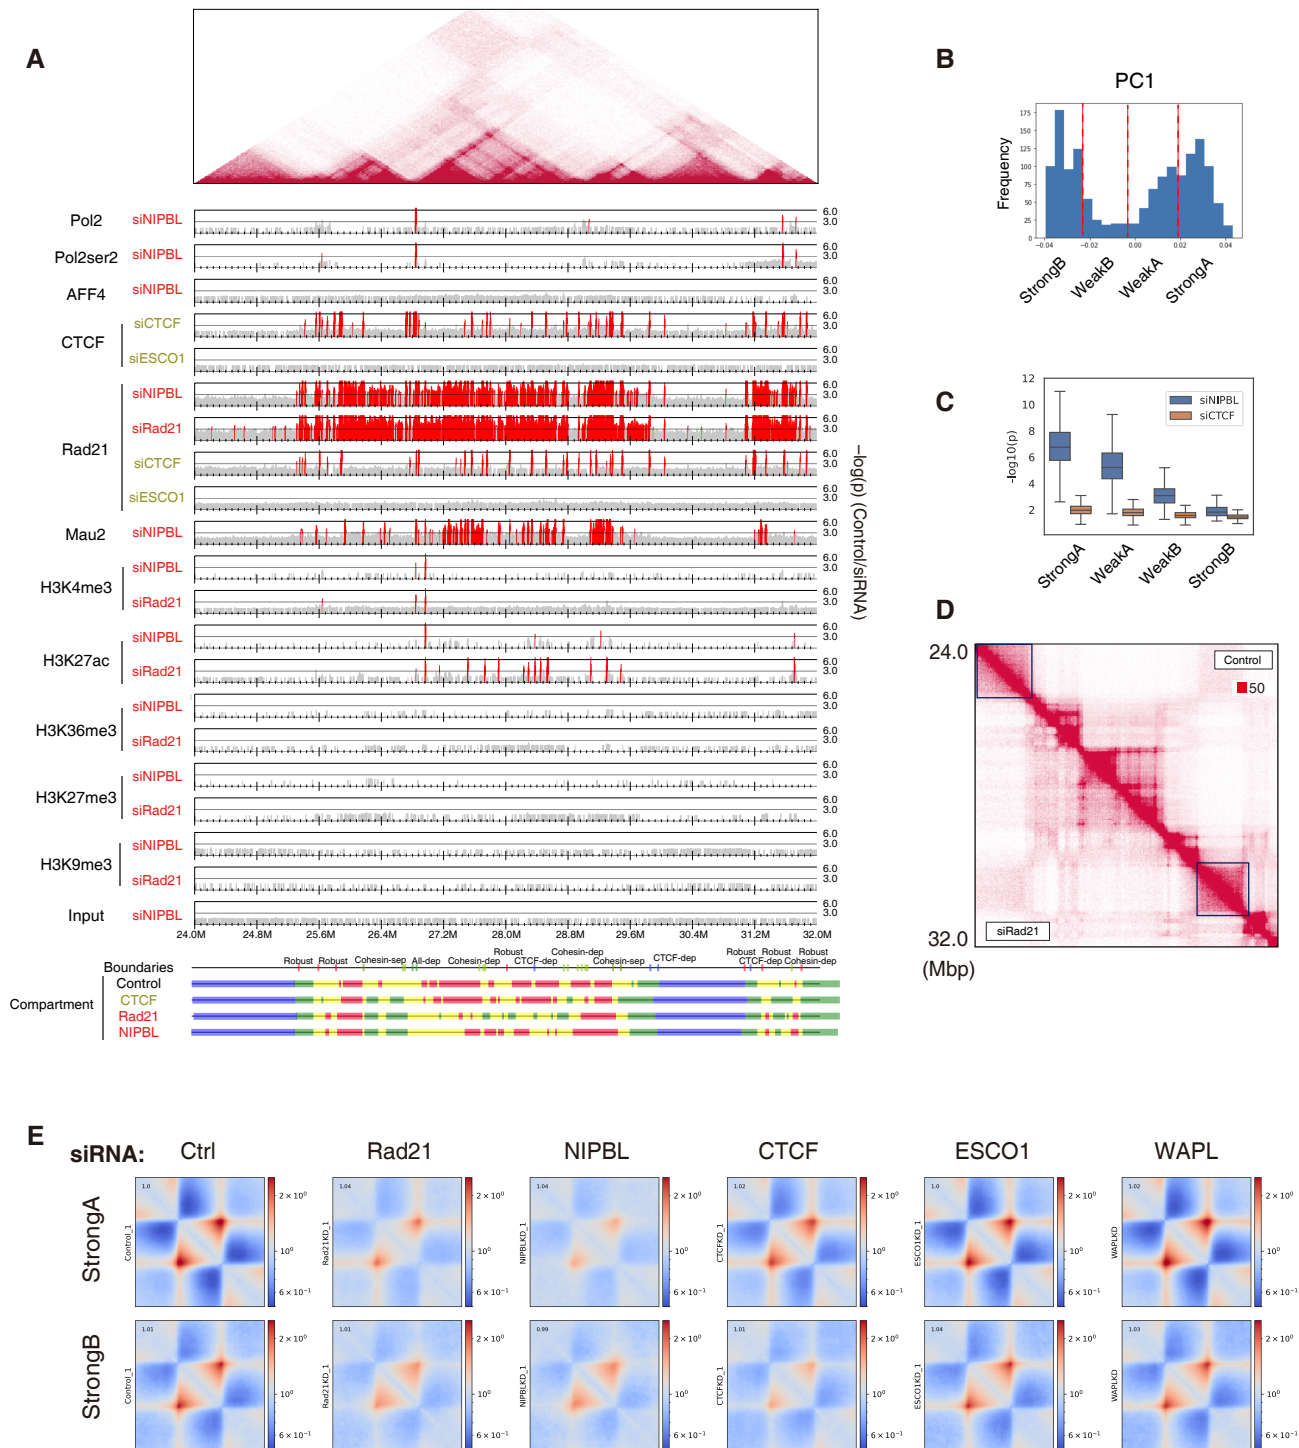

Source: https://www.biorxiv.org/content/10.1101/2022.05.24.493188v1.full.pdf
